# 1 Dosage sensitivity in Pumilio1-associated diseases involves two distinct 2 mechanisms

3

4 Salvatore Botta<sup>1,2</sup>, Nicola de Prisco<sup>1</sup>, Alexei Chemiakine<sup>1</sup>, Maximilian Cabaj<sup>1</sup>, Purvi Patel<sup>3</sup>,  
5 Rajesh K. Soni<sup>3</sup>, and Vincenzo A. Gennarino<sup>1,4,5,6,7</sup>

6

7 <sup>1</sup>Department of Genetics and Development, Columbia University Irving Medical Center, New York, NY.

8 <sup>2</sup>Department of Translational Medical Science, University of Campania Luigi Vanvitelli, Caserta, Italy.

9 <sup>3</sup>Proteomics and Macromolecular Crystallography Shared Resource, Herbert Irving Comprehensive  
10 Cancer Center, Columbia University Irving Medical Center, New York, NY.

11 <sup>4</sup>Departments of Pediatrics and Neurology, Columbia University Irving Medical Center, New York, NY.

12 <sup>5</sup>Columbia Stem Cell Initiative, Columbia University Irving Medical Center, New York, NY.

13 <sup>6</sup>Initiative for Columbia Ataxia and Tremor, Columbia University Irving Medical Center, New York, NY.

14 <sup>7</sup>Corresponding author: Vincenzo A. Gennarino, Department of Genetics and Development, Columbia  
15 University Irving Medical Center, 701 West 168th Street, HHSC 1402 New York, NY 10032; +1 212-  
16 305-7863; [vag2138@cumc.columbia.edu](mailto:vag2138@cumc.columbia.edu)

17

## 18 Abstract

19 Mutations in the RNA-binding protein (RBP) Pumilio1 (PUM1) can cause dramatically different  
20 phenotypes. Mild mutations that reduce PUM1 levels by 25% lead to a mild, adult-onset ataxia, whereas  
21 more severe mutations that reduce PUM1 levels 40-60% produce an infantile syndrome involving  
22 multiple developmental delays and seizures. Why this difference in expression should cause such  
23 different phenotypes has been unclear; known PUM1 targets are de-repressed to equal degrees in both  
24 diseases. We therefore sought to identify PUM1's protein partners in the murine brain. We identified a  
25 number of putative interactors involved in different aspects of RNA metabolism such as silencing,  
26 alternative splicing, and polyadenylation. We find that PUM1 haploinsufficiency alters the stability of  
27 several interactors and disrupts the regulation of targets of those interactors, whereas mild PUM1 loss  
28 only de-represses PUM1-specific targets. We validated these phenomena in patient-derived cell lines and  
29 show that normalizing PUM1 levels rescues the levels of interactors and their targets. We therefore  
30 propose that dosage sensitivity does not necessarily reflect a linear change in levels but can involve  
31 distinct mechanisms. Studying the interactors of RBPs *in vivo* will be necessary to understand their  
32 functions in neurological diseases.

## 33 Introduction

34 To quickly respond to a specific perturbation, cells must modify their protein repertoire. RNA-  
35 binding proteins (RBPs) accomplish this at the post-transcriptional level, regulating RNA localization,  
36 transport, translation, splicing, and decay; they have been found to orchestrate hundreds of pathways that  
37 are responsible for proper biological functions (1, 2). RBPs can coordinate or compete with each other or  
38 exert mutual influence (3), and they also interact with microRNAs (miRNAs) to suppress the expression  
39 of their target genes by binding to a short complementary seed region in the 3' UTRs of mRNAs. RBPs  
40 and microRNA machinery are particularly important in neurons, whose plasticity demands a rapid local  
41 response to stimuli that can be quite distant from the nucleus (4). It is therefore not surprising that  
42 disruptions in RBPs underlie several complex neurological disorders. For example, large CAG  
43 expansions in the RBP FMRP cause Fragile X syndrome, but milder “premutations” in FMRP cause  
44 adult-onset Fragile X-associated tremor and ataxia syndrome (FXTAS) (5). The RBPs TDP43 and FUS  
45 are both involved in amyotrophic lateral sclerosis, and TDP43 mutations is linked to frontotemporal  
46 dementia (6, 7). Despite increasing interest in how RBPs influence neuronal function through target  
47 regulation, we still know relatively little about RBP interactions and regulation (7-9).

48 Our recent work on the RBP Pumilio1 (PUM1) has led us to consider RBP interactions. We found  
49 that mutations in PUM1 that reduce its levels by 40-60% cause a neurodevelopmental disease in humans  
50 (PUM1-associated developmental delay and seizures, or PADDAS). PADDAS causes cognitive, speech,  
51 and motor delays and seizures. On the other hand, mild mutations in PUM1 that reduce its levels by only  
52 25% lead to a slowly progressive, pure ataxia with onset in mid-life (PUM1-related cerebellar ataxia or  
53 PRCA). Although the severity of the PRCA and PADDAS phenotypes tracks with the levels of functional  
54 PUM1, precisely what is happening at the molecular level remains unclear. PUM1 contains a highly  
55 conserved RNA-binding domain composed of eight tandem repeats known as Puf homology domains  
56 (HDs). While the mutation that produces mild disease (PRCA), T1035S, lies within the HD domain and  
57 impairs RNA binding, the most severe PADDAS mutation (R1147W) lies outside this domain and does  
58 not impair RNA binding (10, 11). Moreover, known PUM1 targets are upregulated to similar degrees in  
59 the PRCA and PADDAS patient cell lines (10). This suggested to us that PRCA might be caused by  
60 deregulation of PUM1 targets, whereas PADDAS might result from disruption of PUM1's interactions  
61 with its protein partners along with de-repression of the targets of these complexes.

62 Testing this hypothesis requires identifying PUM1 interactors in the mouse brain. Although a great  
63 deal is known about the PUMILIO/FBF (PUF) family of RBPs (12-20), of which PUM1 and its homolog  
64 PUM2 are members, little is known about PUM1 function in the postnatal mammalian brain. Protein  
65 interactions in general, and those of PUF family members specifically, can be organism-, transcript-, and

66 even condition-specific (21). We therefore took an unbiased approach by using *in vivo* proteomics to  
67 identify PUM1's native partners. Since *Drosophila* studies show that Pumilio can change its protein  
68 partners in different neuronal types (22), we first examined the brain as a whole and then repeated our  
69 analyses in three distinct brain regions that most highly express PUM1. We then determined the effect of  
70 loss of PUM1 on a subset of RBP interactors that were the most highly connected within the interactome,  
71 using *PUM1* heterozygous and homozygous null mice and patient-derived cell lines. We identified targets  
72 shared among these interactors and examined their responses to PUM1 insufficiency in mice and cell  
73 lines from patients bearing the T1035S and R1147W mutations. These data underscore the need to  
74 examine all the interactions an RBP is engaged in.

75

## 76 Results

### 77 *Establishing the Pumilio1 interactome across the adult mouse brain*

78 To identify interactors of Pum1 (the murine protein), we performed co-immunoprecipitation (IP) for  
79 Pum1 on whole brains from 10-week-old wild-type (WT) mice, followed by liquid chromatography with  
80 tandem mass spectrometry (LC-MS/MS, or simply mass spec); we used IP against IgG (IP-IgG) as a  
81 negative control (see Methods). Post-IP western blot detected no residual Pum1 from brain tissue  
82 confirming that our protocol recovers virtually all of Pum1 (Supplemental Figure 1). To increase the  
83 likelihood that our candidates would prove to be genuine interactors, we required putative interactors to  
84 have at least two unique peptides present in at least five out of six IP-Pum1 samples compared to IP-IgG  
85 in label-free quantification intensity (LFQ-intensity, see Methods).

86 This analysis yielded 412 putative Pum1 interactors (Supplemental Figure 2A and Supplemental  
87 Table 1). We incorporated mammalian protein-protein interaction data from CORUM and the Human  
88 Protein Atlas by using g:GOSt (g:Profiler; see Supplemental Methods) (23) to reveal 22 clusters of  
89 functionally related proteins (Supplemental Figure 2A). Among the putative interactors we found those  
90 that have been previously identified, supporting the validity of our approach. For example, our mass spec  
91 identified Pum2 and Fmrp, which associate with Pum1 in neural progenitor cells (24). Other identified  
92 proteins belong to families previously found to interact with PUM1 *in vitro*, such as CNOT1, which is the  
93 central scaffold of the CCR4-NOT complex (16, 25), which PUM1 recruits to shorten poly(A) tails and  
94 promote mRNA degradation (15-17). Translation initiation factors (cluster 3) have been found to  
95 cooperate with Puf proteins in other species (26), and human PUM2-mediated repression was found to  
96 require PABPC1, while our mass spec yielded Pabpc4 (17). Cluster 8, which includes proteins that have  
97 been associated with RNA fate regulation, was the most strongly interconnected with other clusters.

98 Given the plethora of putative interactors, and the tissue-specificity of interactions (22), we repeated

99 the mass spec experiments on the cerebellum, hippocampus, and cortex, where Pum1 is most highly  
100 expressed (11). Scatter-plots and PCA showed a clear separation of Pum1 and IgG samples  
101 (Supplemental Figure 3A-D). Through this analysis we identified 854 putative Pum1 interactors in the  
102 cerebellum, 423 in the hippocampus, and 598 in the cortex (Figure 1A; Supplemental Table 1). 467 were  
103 unique to the cerebellum, 140 to the hippocampus, 229 to the cortex, and 154 unique to the rest of the  
104 brain (i.e., excluding these three regions). Only 88 candidates were shared among these three brain  
105 regions and the whole brain (Figure 1A, *yellow dots*). Interestingly, the only brain region to show  
106 interaction between Pum1 and Pum2 was the cortex (Supplemental Figure 4A), despite the fact that Pum2  
107 is expressed at roughly the same levels in the three brain regions (Supplemental Figure 4B).

108 This region-specific analysis yielded the same components of the APC/C (Supplemental Figure 4C)  
109 and mTOR pathways (Supplemental Figure 4D) across the three brain regions, but expanded the list of  
110 Pum1 interactors in several other afore-mentioned pathways (Figure 1A, Supplemental Figure 4C-E). For  
111 example, Cnot1 and Cnot2 turned up in all three brain regions, while Cnot10 appears to be cortex-specific  
112 (Figure 1A, Supplemental Figure 4E). There were many proteins involved in translation initiation, with  
113 Eif3b being specific to the hippocampus (Supplemental Figure 4E). Rbfox1 was specific to the cortex,  
114 and Rbfox2 to the cerebellum and hippocampus (Figure 1A), consistent with previous work showing that  
115 Rbfox1 mediates cell-type-specific splicing in cortical interneurons (27) and that Rbfox2 is needed for  
116 cerebellar development (28).

117 We then performed DAVID Gene Ontology analysis for hits from both the whole brain and from each  
118 brain region analyzed (Figure 1B and Supplementary Table 2). The main categories identified were  
119 ubiquitin ligases (anaphase-promoting complex [APC/C], E2/E3 and K11-linked ubiquitin) and RBPs  
120 involved in various aspects of RNA metabolism (RNA silencing, 3'UTR binding, mRNA stability,  
121 transport, and splicing). We prioritized the RBPs in cluster 8 (Supplemental Figure 2)—Fmrp and Ago2  
122 (involved in RNA silencing), Pum2, Cnot1, and Rbfox3 (an alternative splicing factor)—for the following  
123 reasons. First, this cluster was the most highly interconnected with other clusters; second, RNA-related  
124 categories were prominent in the gene ontology analyses for both whole brain and all three brain regions;  
125 third, these RBPs have been well studied and would allow us to more readily test the consequences of  
126 PUM1 loss; fourth, these proteins are associated with Pum1 in whole brain; lastly, these proteins have  
127 been studied mostly *in vitro* and have never been associated with Pum1 in the murine brain.

128

129 *Pum1 associates with Pum2, Fmrp, Ago2, and Cnot1 in the absence of mRNA*

130 The associations of Pum1 with Pum2, Fmrp, Ago2, Rbfox3, and Cnot1 were confirmed by co-IP  
131 followed by western blot (Figure 2A, *left panel*). Since Fmrp and Ago2 both bind Mov10 *in vitro* (29,



132 30), we also blotted for murine Mov10. Mov10 was pulled down with Pum1, likely in concert with Fmrp  
133 (Figure 2A). We co-IPed Pum1 and blotted for all six RBPs in *Pum1*<sup>-/-</sup> mouse brains and detected none of  
134 them (Supplemental Figure 5A), indicating that the Pum1 antibody we used is specific. As negative  
135 controls, we tested other proteins associated with the RISC complex (Ago1 and Ago3) that did not appear  
136 in our mass spec data, and our co-IP experiments found no interactions (Supplemental Figure 5B).

137 To exclude the possibility that the co-IPs recovered proteins that are co-bound to target RNAs but are  
138 not part of the same complex as the protein of interest, we treated mouse brain samples with RNase and  
139 verified that no detectable RNA remained (see Methods). Pum1 still associated with Pum2, Fmrp, Ago2,  
140 and Cnot1 in the absence of mRNA, but not with Rbfox3 or Mov10 (Figure 2A, *right panel*). We repeated  
141 the RNase experiments in HEK293T cells, which confirmed our results (except for RBFOX3, which was  
142 not detectable in these cells) (Figure 2B). These data suggest that Pum1 interacts with all the six RBPs in  
143 brain, and this interaction is RNA-independent.

144

#### 145 *Some interactions among these RBPs require PUM1*

146 To confirm the interaction between Pum1 and the six RBPs and to understand the reciprocal  
147 interactions among the interactors themselves, we performed reciprocal co-IP in wild-type and *Pum1*<sup>-/-</sup>  
148 10-week-old mouse brains for Pum2, Ago2, Fmrp, Cnot1, Rbfox3, and Mov10. We first confirmed that IP  
149 against each of these six RBP is pulling down Pum1 from WT but not from *Pum1*<sup>-/-</sup> mouse brain (Figure  
150 3A-F). Pum2 interacted with Cnot1 only in the presence of Pum1 (Figure 3A). Unexpectedly, Fmrp  
151 associated with Mov10 and Rbfox3 only in the presence of Pum1 (Figure 3B-D). Fmrp and Cnot1 did not  
152 associate in WT brain (Figure 3B, *left*) but did so in the absence of Pum1 (Figure 3B, *right*). Ago2  
153 associated with Pum1, Fmrp, Cnot1 and Mov10 in WT brain, but in the absence of Pum1 it no longer  
154 interacted with Fmrp or Mov10 (Figure 3E). Mov10 associated with Fmrp but not with Ago2 (Figure 3D  
155 and E). Rbfox3 associated with Cnot1 (Figure 3C) but not *vice versa* (Figure 3F). IPs against Pum2,  
156 Ago2, Fmrp, Cnot1, Rbfox3, and Mov10, performed in the presence or absence of RNA in WT and  
157 *Pum1*<sup>-/-</sup> mouse brains (Supplemental Figure 6A-F) confirmed that, in the absence of Pum1, these  
158 interactions require RNA.

159 In summary, Pum1 associates with Pum2, Fmrp, Ago2, and Cnot1, with or without RNA (Figure 3A-  
160 F and Supplemental Figure 6A-F). Pum1 seems to be required for association between Fmrp, Mov10 and  
161 Rbfox3, and between Ago2 and Fmrp, Mov10, and Cnot1. In the absence of Pum1, the associations  
162 between Pum2, Fmrp, Ago2 and Cnot1 require RNA (Supplemental Figure 6A-F). These data suggest  
163 that the interaction between Pum1 and these RBPs seems to be prior binding the RNA.

164 *Pum1 loss alters levels of RBP interactors in mouse cerebella by brain region and sex*

165 If *Pum1* is an important interactor for these six RBPs, loss of *Pum1* should affect their stability or  
166 abundance. *Pum1* heterozygous and homozygous null mice showed changes in the quantities of *Pum2*,  
167 *Ago2*, and *Mov10* proteins across the brain (Supplemental Figure 7A), but only *Pum2* showed changes in  
168 mRNA levels (Supplemental Figure 7B). Since *Ago2* and *Mov10* levels fell only in male mice  
169 (Supplemental Figure 7A), we quantified *Pum2*, *Fmrp*, *Ago2*, *Rbfox3*, *Cnot1* and *Mov10* in the  
170 cerebellum, cortex, and hippocampus of male and female mice. We first measured *Pum1* mRNA and  
171 protein levels to confirm the reduction of *Pum1* in our *Pum1*<sup>+/-</sup> or *Pum1*<sup>-/-</sup> mice in each brain region  
172 (Figure 4A-C, and Supplemental Figure 8). *Pum2* protein levels rose in all three brain regions, as did its  
173 mRNA (Figure 4A-C, and Supplemental Figure 8).

174 As previously reported, *Fmrp* protein expression was upregulated in all three brain regions in male  
175 KO mice, but in female KO cerebella *Fmrp* was reduced by almost 70% (Figure 4A) (31, 32). Three other  
176 proteins also showed divergent responses to *Pum1* loss according to sex and brain region: *Ago2*, *Rbfox3*  
177 (in the hippocampus), and *Cnot1* (in the cerebellum) (Figure 4A-C). None of these proteins showed any  
178 changes in mRNA levels (Supplemental Figure 8), despite the fact that *Fmr1* and *Cnot1*, like *Pum2*, have  
179 a Pumilio Response Element (PRE) (33) in their 3'UTR. In summary, these data suggest that loss of  
180 *Pum1* could cause a sex- and region-specific reorganization of these complexes, or that there are  
181 additional sex-specific *Pum1* interactors.

182

### 183 *Pum1* loss dysregulates *Ago2* and the microRNA machinery in mouse cerebella by sex

184 To confirm these *Pum1* sex-specific functions—and because *Pum1* loss has deleterious effects on the  
185 cerebellum in both mice (11) and humans (10)—we asked whether the divergence of *Ago2* protein levels  
186 in males and females extended to cerebellar miRNAs. A miRNAseq found 701 expressed miRNAs, many  
187 of which diverged in expression between the two sexes (Supplemental Figure 9). Hierarchical heatmap  
188 clustering of significant miRNA expression in *Pum1*<sup>-/-</sup> and WT male and female cerebella at 10 weeks of  
189 age revealed that the expression of 166 miRNAs (Supplemental Table 3) diverged between the two sexes  
190 in parallel with *Ago2* expression (Figure 4D).

191 To examine the functional consequences of this *Ago2*/miRNA dysregulation, we studied the  
192 expression of downstream targets that are co-bound by those miRNAs in 10-week-old WT and *Pum1*<sup>-/-</sup>  
193 male and female cerebella. To perform this experiment we selected all the miRNAs with at least a 25%  
194 change in expression in either direction, for a total of 49 miRNAs. Using TargetScan and CoMeTa (34,  
195 35) we identified 6832 putative targets that are co-bound by at least 2 out of 49 possible miRNAs. We  
196 prioritized targets that are co-bound by at least 8 miRNAs, for a total of 49 putative targets. *Pum1*<sup>-/-</sup> male  
197 and female cerebella showed gene expression changes for 44 out of these 49 targets, which correlated

198 with the sex-dependent differences in Ago2 levels (Figure 4E, Supplemental Figure 10 and Supplemental  
199 Table 4).

200 To elucidate the biological pathways in which these miRNAs play an essential role, we performed  
201 David Gene Ontology with all the non-redundant targets predicted by CoMeTa (35) and TargetScan 7.1  
202 (34) that are co-bound by at least four miRNAs. This analysis yielded 2127 targets (Supplemental Figure  
203 11A-C). Under "cellular components" there was an enrichment in multiple categories having to do with  
204 synaptic function. Under "biological processes" the most enriched categories are organ growth and post-  
205 embryonic development (PADDAS children have growth defects (10), consistent with this GO analysis).  
206 Under KEGG pathways, there was a particular enrichment in Wnt signaling, dopaminergic and  
207 cholinergic pathways, cancers (increased Pum1 levels have been described in several cancers (36-38)),  
208 protein ubiquitination (which accords with interactions with the APC/C complex).

209 To understand the neuron-related biological pathways, the same targets were analyzed by SynGO  
210 (39), a curated ontology analysis based on genes that are exclusively expressed in specific neurons from  
211 single-cell data. SynGO confirmed that 117 targets are presynaptic, whereas 124 are postsynaptic  
212 (Supplemental Figure 11D). Moreover, among the 166 miRNAs inversely expressed between sexes, we  
213 found the entire miR-200 family (miR-200a, miR-220b, miR-200c, miR-141, and miR-429), which has  
214 been reported to regulate crucial targets involved in neurogenesis, glioma, and neurodegenerative diseases  
215 (40, 41). Overall, these results are consonant with our mass spec and suggest an intimate relation between  
216 Pum1 and Ago2 in mouse cerebellum.

217

218 *Pum1, Pum2, Fmrp, Ago2, and Rbfox3 share their top targets*

219 If indeed the complexes Pum1 forms with these RBPs are physiologically relevant, as seen for Ago2  
220 in cerebellum, then they should co-regulate at least some of the same mRNA targets. Indeed, one  
221 corollary of the "regulon theory," which posits that mRNA targets in the same pathway are co-regulated  
222 (2, 42-44), is that there should be a discernible set of RBPs that do the co-regulating.

223 To test this hypothesis, we analyzed all the high-throughput sequencing UV-crosslinking and  
224 immunoprecipitation (HITS-CLIP) data available from the murine brain (such data exist for Fmrp (45),  
225 Ago2 (46), Rbfox3 (47), Pum1, and Pum2 (24)). We then performed gene set enrichment analysis  
226 (GSEA) (48) using Fmrp as the basis for comparison (because it has the largest dataset). As negative  
227 controls, we used HITS-CLIP data from mouse brain for four RBPs that did not show up as Pum1  
228 interactors in our mass spec: Mbnl2 (49), Nova (50), Apc (51), and Ptpb2 (52).

229 This analysis revealed that Pum1 targets were preferentially distributed in the top 5th percentile of all  
230 Fmrp targets, with an enrichment score (ES) of 0.93 (the maximum is 1) and a FDR of 0 (Figure 5A, *blue*

231 *line represents ES*). Pum2, Ago2, and Rbfox3 showed nearly identical patterns (Figure 5A). There was no  
232 significant overlap between the targets of Fmrp and those of any negative control (Nova had the highest  
233 ES, but this was only 0.36 with a rank max of 45<sup>th</sup> percentile and FDR=1; Figure 5B). Neither Pum1,  
234 Pum2, Rbfox3, Fmrp, nor Ago2 targets were enriched among any of the ranked target lists of the negative  
235 controls (Supplemental Figure 12A, and *data not shown*).

236 To ascertain that the highest-ranking Fmrp targets correspond to the genes with the highest  
237 probability of being Pum1 targets, we divided the Fmrp ranked target list into 10 equal bins according to  
238 percentile. We then repeated GSEA of Pum1 HITS-CLIP data for each bin and found that 648 of the 1194  
239 identified Pum1 targets (54%) are in the top 10<sup>th</sup> percentile of Fmrp targets, with an ES of 0.8 (Figure  
240 5C). This was also true for Pum2, Ago2, and Rbfox3 (Figure 5C).

241 We performed the same analysis using the Pum1 target list as the basis for comparison. We ran  
242 GSEA on each of the four Pum1 partners against the list of Pum1 target genes, and each partner's targets  
243 are within the top 20% of the Pum1 list (Figure 5D). Specifically, Fmrp's targets reside in the top 10<sup>th</sup>  
244 percentile (with an ES of 0.81), Pum2's targets within the 16<sup>th</sup> percentile (ES=0.9), Ago2's targets within  
245 the 18<sup>th</sup> percentile (ES=0.76), and Rbfox3's targets within the 19<sup>th</sup> percentile (ES=0.67). The four RBPs  
246 used here as negative controls have a minimum rank at the 37<sup>th</sup> percentile, and the best ES was 0.26 for  
247 *Apc*; none of the five reached statistical significance (Figure 5D). These analyses demonstrate that there is  
248 substantial overlap among the highest-ranked targets of Pum1, Pum2, Fmrp, Ago2, and Rbfox3.

249 We also studied the targets shared by Pum1, Pum2, Ago2, and Rbfox3 to determine how they  
250 distribute within Fmrp. We found an ES of 0.93 falling within the top 5<sup>th</sup> percentile (Figure 5E); 141 out  
251 of 175 common targets were within the top 10<sup>th</sup> percentile (bin 1) of Fmrp targets, with 99 within the top  
252 5<sup>th</sup> (Figure 5F). This contrasts with the negative controls, for which the best ES was 0.41 within the top  
253 40<sup>th</sup>-60<sup>th</sup> percentile (Figure 5G). DAVID gene ontology analysis of those 175 common targets between  
254 Ago2, Pum1, Pum2, Fmrp, and Rbfox3 revealed pathways enriched in neurons and axonal projections  
255 (Supplemental Figure 12B and C). Previous studies have shown that Pum1 and Pum2 cooperate with the  
256 miRNA machinery to suppress certain targets (11, 13). Among Fmrp HITS-CLIP targets, there were  
257 almost 300 microRNAs. Pum1 HITS-CLIP has 60 miRNAs, only four of which are not shared with Fmrp;  
258 Pum2 HITS-CLIP has no miRNAs that are not shared with either Pum1 or Fmrp (Supplemental Figure  
259 12D and Supplemental Table 6).

260

261 *PUM1 interactors are destabilized in cell lines from PADDAS, but not PRCA, patients*

262 Having identified Pum1 interactors and shared targets, we asked whether mutations associated with  
263 either mild or severe disease destabilize human PUM1 interactors in patient-derived cell lines. For

264 PADDAS, we compared fibroblasts from one 9-year-old female patient (R1147W) with fibroblasts from  
265 three different 9-year-old female healthy controls. For PRCA, we compared lymphoblastoid cells from  
266 two female PRCA patients (both with the T1035S mutation; 59 and 58 years old, respectively) with  
267 lymphoblastoid cells from three different 58-year-old female healthy controls (10). IP against PUM1  
268 followed by western blot showed that PADDAS cells had 49%, and PRCA cells 76%, of the amount of  
269 PUM1 found in healthy controls (Supplemental Figure 13A and B), consistent with our previous report  
270 (10). Post-IP did not detect any residual PUM1 from PADDAS or PRCA cell lines, or their controls,  
271 confirming that our protocol efficiently pulled down PUM1 protein from both patient-derived cell lines  
272 (Supplemental Figure 13C and D).

273 Co-IP confirmed that PUM1 associates with FMRP, AGO2, CNOT1, and MOV10 in patient cell lines  
274 (Supplemental Figure 13A and B). The mild T1035S variant reduced PUM1 binding to AGO2 but this  
275 was not significant (Supplemental Figure 13D). The more severe R1147W, however, reduced PUM1  
276 association with AGO2, CNOT1, and MOV10 by ~84%, ~59%, and ~90%, respectively (Supplemental  
277 Figure 13A). Interaction with FMRP did not appear to be affected. (We could not examine the effect of  
278 PUM1 mutations on RBFOX3, which is not expressed in fibroblasts or lymphoblastoid cells.)

279 To compare the mutants in the same cell type, we turned to HEK293T cells. We found that GST-  
280 AGO2 associated with Myc-PUM1-R1147W 72% less than it did with Myc-PUM1-WT (Figure 6A), in  
281 alignment with our observations in the PADDAS cell lines (Supplemental Figure 13A and B). We also  
282 found ~35% less interaction with CNOT1 (Figure 6B) but no decrease in PUM1 association with FMRP  
283 (Figure 6C), again in accord with our findings in patient-derived cells (Supplemental Figure 13A and B).

284 We next asked whether the R1147W mutation might be impaired in binding with WT PUM1. We  
285 found that IP against Myc-PUM1-R1147W pulled down 51% of the total GST-PUM1-WT, while the  
286 interaction between Myc-PUM1-T1035S and GST-PUM1-WT remained unchanged (Figure 6D). The  
287 same interaction was observed after RNase treatment, suggesting that mammalian PUM1 interacts with  
288 itself in the absence of RNA (Supplemental Figure 14A). These data suggest that the R1147W mutation  
289 might exert a dominant-negative effect on WT PUM1. Moreover, the combination of lower protein levels  
290 and marked protein instability explains why the R1147W human phenotype is closer to that of the *Pum1*  
291 null mice than to the heterozygous mice (10).

292 To confirm that R1147W destabilizes PUM1 interactors, we quantified the protein levels of these  
293 RBPs from patient-derived cell lines. This analysis revealed that the proteins that lose their association  
294 with the R1147W variant also are reduced in their expression (Figure 6E). Note that MOV10's association  
295 with R1147W was greatly reduced (Supplemental Figure 13A) even though its protein levels were  
296 unchanged (Figure 6E). AGO2 and CNOT1 levels were unchanged in the PRCA cell line but were ~50%

297 lower in the PADDAS cell line (Figure 6E). The mRNA levels of *PUM1*, *AGO2*, *CNOT1*, and *MOV10*  
298 did not change (Supplemental Figure 14B), confirming that the reductions in their respective protein  
299 levels were due to the loss of interaction with PUM1-R1147W. These data suggest that the R1147W  
300 variant might also exert a dominant-negative effect on PUM1-RBP interactors by destabilizing them.

301

302 *Shared targets are upregulated in PADDAS but not PRCA*

303 We had hypothesized that PRCA involves dysregulation of PUM1 targets, whereas PADDAS  
304 involves both destabilization of PUM1 interactors and dysregulation of their targets. We therefore tested  
305 the effects of the T1035S and R1147W mutations on both shared targets and validated PUM1-specific  
306 targets (11, 24, 53) that are not in the HITS-CLIP data for the other RBPs but are expressed in both  
307 fibroblasts and lymphoblasts. PUM1-specific mRNA were dysregulated to very similar extents in PRCA  
308 and PADDAS patient cells, with only a few targets being up to 20% more upregulated in PADDAS  
309 (Supplemental Figure 14C).

310 Of the 175 targets shared between PUM1, PUM2, AGO2, FMRP, and RBFOX3 (Figure 5E and  
311 Supplemental Table 5), 54 were expressed in both PADDAS fibroblasts and PRCA lymphoblastoid cells.  
312 Fifty-one of those were upregulated in PADDAS but not in PRCA (Figure 7A), by an average of two-fold  
313 (ranging from a low of 121% for *IDS* to 347% for *TLK1*). There was little or no change in most of these  
314 targets in PRCA cells, though levels of *CALM1*, *ATP2A2*, *CREB1*, and *GNAQ* fell by ~40%, and *CALM2*,  
315 *TAOK1*, and *UBE2A* by ~20% (Figure 7A).

316 Finally, we tested whether restoring PUM1 levels would normalize expression of these shared targets.  
317 Transfection of Myc-PUM1-WT in PADDAS cells (Figure 7B, and Supplemental Figure 14D) rescued  
318 AGO2 and CNOT1 protein levels compared to the age- and sex-matched healthy controls (transfection  
319 with an empty vector was used here as negative control) (Figure 7B). Moreover, this reduced the levels of  
320 the top 15 upregulated shared targets. These data confirm that the effects of the R1147W mutation, which  
321 does not impair PUM1 binding to mRNA (10), result from loss of interactions with RBPs that repress the  
322 same mRNA targets. These results also support the hypothesis that the symptoms observed in PRCA are  
323 attributable to the dysregulation of PUM1-specific target genes, while PADDAS involves both protein  
324 partner destabilization and dysregulation of the partner proteins' targets.

325

## 326 Discussion

327 Since our initial study describing PUM1-related diseases (10), we and others have identified  
328 additional PADDAS and PRCA patients (10, 54-56). In our cohort, the R1147W mutation accounts for  
329 the majority of PADDAS patients, and T1035S for the majority of PRCA, which supports the value of



330 studying these particular two mutations. The question that drove the present study is: why should the  
331 additional 25% drop in PUM1 levels from PRCA to PADDAS produce such different phenotypes,  
332 especially when R1147W is not impaired in binding to mRNA? Our data support the hypothesis that the  
333 difference is not due to a linear increase in the de-repression of mRNA targets but is rather a function of  
334 an additional mechanism coming into play: the destabilization of numerous interactors and the de-  
335 repression of their downstream targets. This conclusion relies on five lines of evidence. First, loss of  
336 Pum1 in heterozygous and knockout mice changes the levels of associated proteins, with unexpected  
337 differences emerging between brain regions and between male and female mice. These differences  
338 involved exchanges between members of the same protein families (e.g., the Rbfox family). The odds of  
339 consistently identifying specific proteins in different brain regions and sexes as false positives, across as  
340 many mice as these experiments required, are extremely low. Second, we observed diminished function  
341 of the RBP interactors in the absence of Pum1, insofar as their targets are dysregulated in Pum1-KO mice;  
342 moreover, the dysregulation of miRNA showed opposite patterns in male and female cerebella that  
343 correlated with the sex-specific patterns of Ago2 expression. Third, the levels of these proteins were  
344 reduced 40-70% in PADDAS patient cell lines, despite unaltered mRNA levels, but not in PRCA patient  
345 cells; we also found that 55 shared targets expressed in both lymphoblasts and fibroblasts were  
346 derepressed in PADDAS, but not PRCA, cells. Fourth, our *in vitro* studies showed that AGO2 and  
347 CNOT1 lose their interaction with PUM1-R1147W. Fifth, re-expression of PUM1 in PADDAS cell lines  
348 rescued the levels of its interactors and restored suppression of downstream shared targets. In aggregate,  
349 these data suggest that a ~50% loss of PUM1 disrupts interactions with native partners, differentiating  
350 PADDAS from PRCA. These results underscore the importance of examining RBP interactions *in vivo*, in  
351 specific contexts (different sex or brain regions), with and without RNase treatment.

352 There are other dosage-sensitive proteins that produce different phenotypes depending on their  
353 expression level (57), and our results raise the possibility that interacting complexes may be disrupted  
354 once expression falls below a certain threshold. What that threshold might be likely differs for different  
355 proteins, but for PUM1 it seems to be somewhere between the 75% of wild-type levels of PUM1 seen in  
356 PRCA and the 60% level estimated for the R1139W mutation that produced a milder form of PADDAS  
357 (10). In this context it is worth noting that a recent study found that, below a threshold of ~70% of normal  
358 levels of FMRP, there were steep decreases in IQ for each further decrement in FMRP levels, even as  
359 small as 5-10% (58). The amount of loss that can be sustained for a given protein would likely depend on  
360 its usual quantities, and it is possible that for some proteins, the difference in phenotype between greater  
361 and lesser abundance may indeed reflect a linear progression from mild to severe. For example, in  
362 proteopathies such as Alzheimer's or Parkinson's disease, genetic duplications of *APP* or *SNCA* cause an

363 earlier onset of what is recognizably the same disease (59, 60). Similarly, a mutation in *MECP2* that  
364 reduces its protein levels by only 16% is still sufficient to cause a mild form of Rett syndrome (61).

365 In contrast, there are diseases in which the phenotypes do not simply range from mild to severe  
366 versions of the same symptoms, but seem to take on a different character. In the polyglutaminopathies,  
367 the disease-causing protein bears an abnormally expanded CAG tract that tends to expand upon  
368 intergenerational transmission. Although the range of normal and pathogenic repeat tract lengths differs  
369 from one polyglutamine disease to another, larger expansions are more unstable, cause earlier onset, and  
370 affect far more tissues than smaller expansions (62). For example, adult-onset SCA7 presents as ataxia,  
371 but infantile SCA7 affects the entire nervous system, the heart, and the kidneys, and leads to death by two  
372 years of age (63). Another example is Huntington's disease (HD), where the juvenile form frequently  
373 lacks the classic chorea yet produces seizures, which are not a feature of the adult-onset disease; brain  
374 morphometry is also quite different in adult- and juvenile-onset cases (64). In this family of diseases,  
375 therefore, the mechanism is the same (repeat expansion), but different tissues have different thresholds for  
376 the CAG repeats. Moreover, the brain regions most vulnerable to HD show dramatic levels of somatic  
377 instability that correlate better with clinical outcomes than the germline polyglutamine expansion (65,  
378 66).

379 In the case of PUM1-related disease, it seems that an additional mechanism comes into play for the  
380 more severe phenotypes, beyond upregulation of mRNA targets. Interestingly, FMRP, which harbors a  
381 dynamic CGG repeat, is also associated with very different diseases, through two different mechanisms.  
382 Very large expansions silence the gene and produce Fragile X syndrome, whereas premutations are  
383 thought to cause the adult-onset Fragile-X-associated tremor/ataxia syndrome through RNA toxicity  
384 (FXTAS) (67). Interestingly, the clinical presentation of FXTAS differs by sex. We have more females  
385 with PUM1 mutations in our cohort, but with only 60 patients the sample is too small to draw any  
386 conclusions about the influence of sex on either the PADDAS or PRCA phenotype.

387 There are several limitations to this study. The most notable is that it is difficult to demonstrate  
388 direction interactions *in vivo*, and it is theoretically possible that we could be seeing post-lysis  
389 interactions. However, we examined the interactions in different brain regions where the two proteins of  
390 interest are equally expressed, and we repeatedly identified interactions that were consistently restricted to  
391 certain regions, such as with Pum2. A mere post-lysis interaction cannot be specific to a particular brain  
392 region or sex, especially with as many biological replicates as we have performed. We also had only  
393 three patient cell lines to test (one PADDAS, two PRCA), and lymphoblasts and fibroblasts are not  
394 directly comparable; they are also not neurons. Nevertheless, both fibroblasts and lymphoblasts express  
395 almost one-third of the shared targets we identified in mouse brains, and these were clearly dysregulated

396 in both cell types. Moreover, we replicated the patient-derived cell line results *in vitro* with tagged  
397 proteins. Future studies in iPSC-derived neurons would be useful, although the neuronal type and the sex  
398 of the patient would have to be taken into account.

399 Despite these clear limitations, our data suggest some provocative possibilities for future  
400 investigation. It has never been clear how the various modes of action attributed to PUM1 or other RBPs  
401 relate to one another. Our data suggest that the three mechanisms of repression that have been proposed  
402 for PUM1—collaborating with the miRNA machinery (12-14), recruiting the CCR4-NOT deadenylase  
403 complex to trigger degradation (15-17), and antagonizing poly(A)-binding proteins to repress translation  
404 (18)—might be coordinated in neurons, insofar as PUM1, PUM2, FMRP, AGO2, MOV10, CNOT1 and  
405 RBFOX3 (and related proteins in specific brain regions) either interact or are so close to each other within  
406 the ribonucleosome that the loss of Pum1 or RNA can change the composition of the complexes that are  
407 identified by co-IP, in ways that are specific to brain region and sex. In this context it is worth noting that  
408 a very recent study found alternative splicing is altered in hippocampal slices from *Fmrp*-deficient mice;  
409 this observation was attributed to changes in H3K36me3 levels (68), but our data suggest that FMRP has  
410 a closer relationship with the RBFOX protein family and alternative splicing machinery. Indeed, recent  
411 work has provided tantalizing glimpses of close interactions among various kinds of RNA metabolism.  
412 For example, members of the RBFOX family of proteins may, depending on their interactors (and  
413 perhaps cell type, sex, age, and species), be involved in microRNA processing in the nucleus and  
414 translation in the cytoplasm (69). The FMRP/MOV10 complex appears to be involved in regulating  
415 translation through miRNA, with evidence that this role may change according to cell type (29). Another  
416 study used quantitative mass spectroscopy to examine how *Fmrp* expression levels change with age in the  
417 wild-type rat dentate gyrus, and found differences in the levels of myriad proteins; among the 153  
418 proteins with the most significant changes in levels were *Pum1*, *Pum2* and *Papbc1* (70). The region-, sex-,  
419 and age-specificity of certain interactions indicates that unraveling RBP interactomes *in vivo* will require  
420 considerable finesse. But creating such interactomes should lead to a more complex yet realistic picture of  
421 RBP roles in neuronal function and in neurological disease.

422

## 423 Acknowledgments

424 We thank the patients, their families, and their clinical teams for participating in our study, and the  
425 anonymous reviewers for helpful suggestions. We thank Mingyu Cao for help with statistical analyses  
426 and U.N. Wasko for starting the cloning procedure with Myc and GST tag sequences *in vitro*. We also  
427 thank G. Struhl, V. Ambros, T. Duchaine, G. Karsenty, H. Zoghbi, M. Jovanovic, Y. Giardina, V. Brandt,

428 and members of the Gennarino laboratory for helpful discussions and support. This work was supported  
429 by the National Institute of Neurological Disorders and Stroke (NINDS; R01NS109858 to V.A.G.); the  
430 National Ataxia Foundation/Young Investigator Research Grant (V.A.G.); the Brain & Behavior Research  
431 Foundation Young Investigator Award; and the Paul A. Marks Scholar Program, Columbia University  
432 Vagelos College of Physicians and Surgeons. The authors declare no competing interests.

433

#### 434 Author contributions

435 S.B. designed and performed molecular experiments, analyzed and interpreted the data, and drafted the  
436 manuscript. N.D.P. performed the qPCR experiments, *in vitro* immunoprecipitation assays, analyzed the  
437 data, and edited the manuscript. A.C. performed all the brain region dissections in mice, performed the  
438 qPCR experiments and maintained the *Pum1* mutant mouse colony. M.C. performed the cloning  
439 experiments. P.P and R.K.S. performed mass spectrometry and helped analyze the data. V.A.G. conceived  
440 the study, analyzed and interpreted the data, performed molecular experiments, and wrote the manuscript.

441

#### 442 Declaration of Interests

443 The authors declare not competing interests

444

445 Figures (start on next page)

446

Figure 1

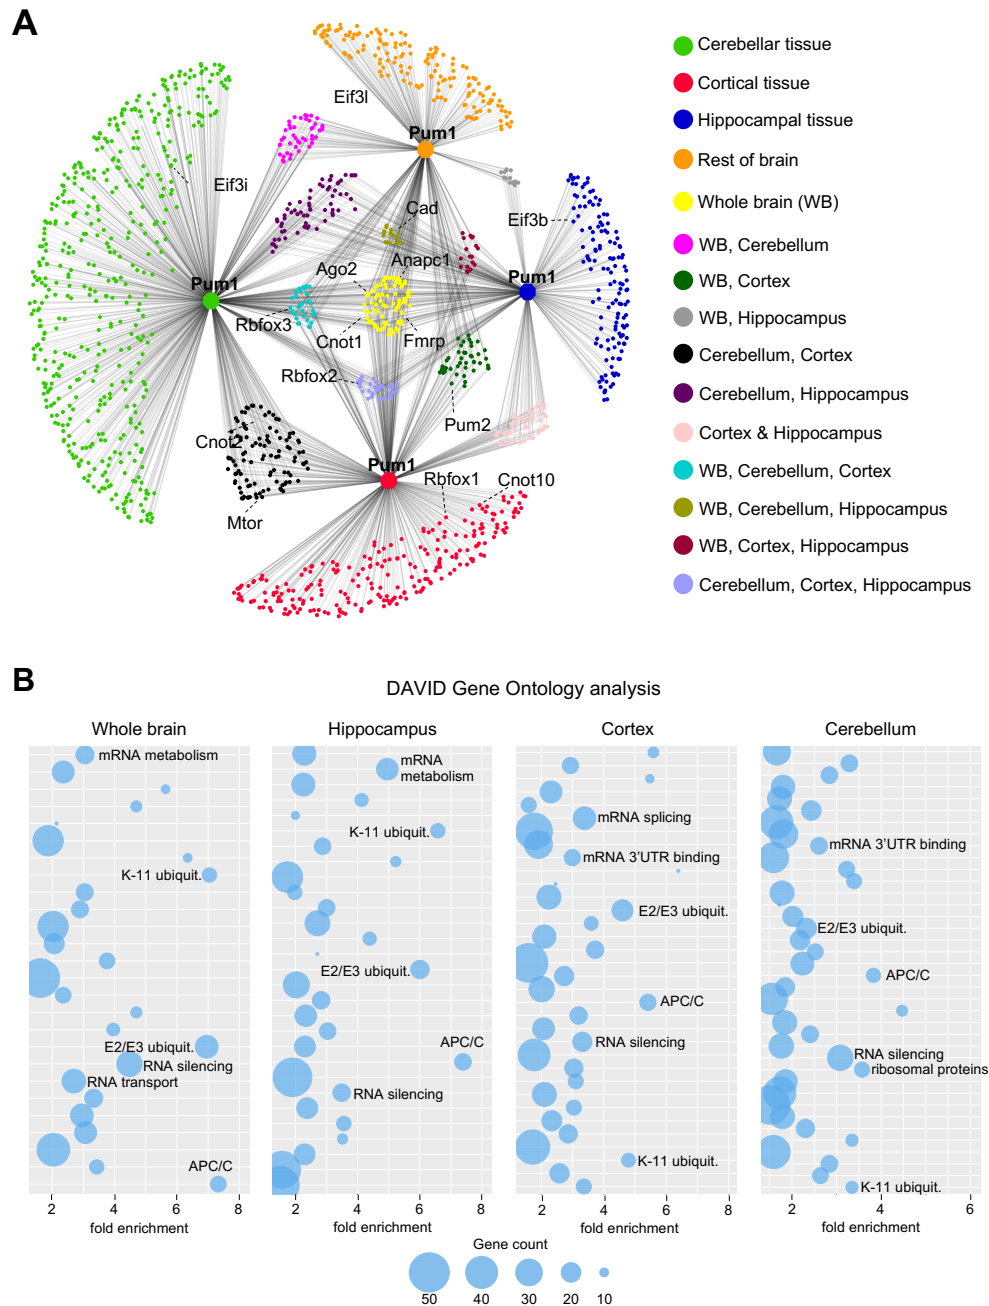

447

448 **Figure 1. A brain-region specific Pum1 interactome.** (A) Pum1 interactome from 10-week-old mouse  
 449 cerebellum (n=8 mice, 4 male and 4 female), hippocampus (n=10, 5/5), cortex (n=8, 4/4) and the rest of  
 450 the brain (i.e., excluding those three regions) for a total of 1,500 proteins (Supplemental Table 1). Node  
 451 colors represent different brain regions or the overlap between two or more brain regions as noted. All  
 452 experiments were performed at least in triplicate. IP against IgG was used as a negative control. (B)

453 Bubble plots show the top categories from gene ontology analyses of Pum1 interactors from whole brain,  
 454 hippocampus, cortex, and cerebellum. Only the categories with fold enrichment >1.5 and FDR<0.05 are  
 455 shown; not all are labeled because of space limitations. The full list of gene ontology categories is  
 456 available in Supplemental Table 2.

457  
 458  
 459  
 460

Figure 2

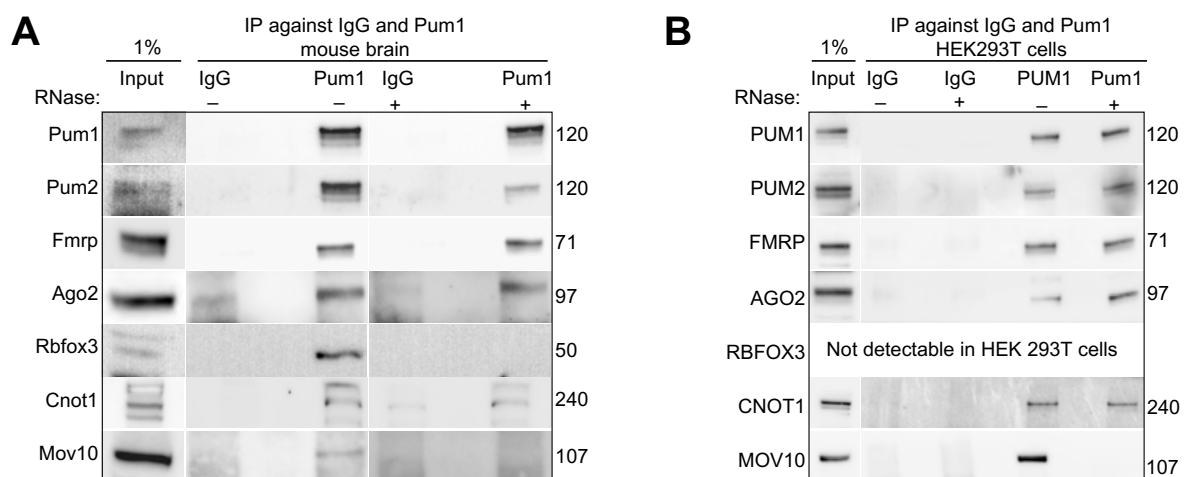

461  
 462  
 463  
 464  
 465  
 466  
 467  
 468  
 469  
 470  
 471  
 472  
 473  
 474

**Figure 2. Validation of Pum1 associations with post-transcriptional RNA-binding proteins in mouse brain and HEK293T cells.** (A) Representative western blot of proteins pulled down by IP against Pum1 compared to IgG from wild-type mice brain without (*left*) and with (*right*) RNase treatment. In this panel, after IP-Pum1, we immunoblotted for Pum1 (positive control), Pum2, Fmrp, Ago2, Rbfox3, Cnot1, and Mov10. (see Methods.). (B) Representative western blots of the same proteins validated in panels A after IP against PUM1 with or without RNase treatment from HEK293T cell lines. In panels A and B, IP against IgG was used as a negative control and Input (1% from the initial protein lysate) as a loading control. The numbers on the right are the respective molecular weights expressed in kilodaltons (kDa). All the experiments were repeated at least four times. All mice were sacrificed at 10 weeks of age.



Figure 3

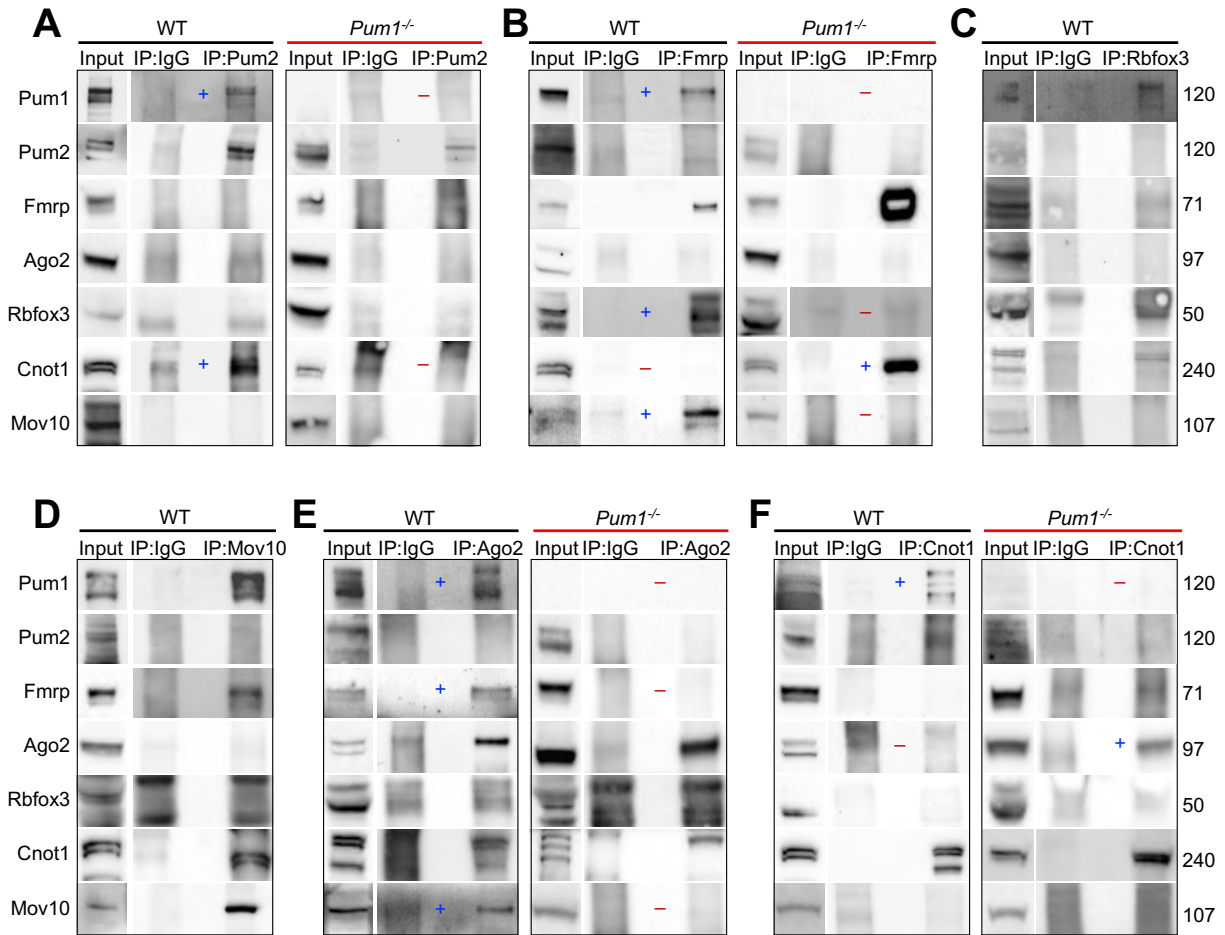

475  
476

477 **Figure 3. Effects of Pum1 loss on interactions among the six RNA-binding proteins.** Representative  
478 western blot of the proteins pulled down by (A) Pum2, (B) Fmrp, (C) Rbfox3, (D) Mov10, (E) Ago2, and  
479 (F) Cnot1 from WT and *Pum1*<sup>-/-</sup> mouse brain at 10 weeks of age. IP against IgG was used as a negative  
480 control, and Input (1% from the initial protein lysate) as a loading control. Molecular weights to the right  
481 are expressed in kilodaltons (kDa). All the experiments were repeated at least three times. Since Rbfox3  
482 and Mov10 interactions with Pum1 are RNA-dependent we did not perform IP from *Pum1*<sup>-/-</sup> mouse brain.

483  
484  
485  
486  
487

Figure 4

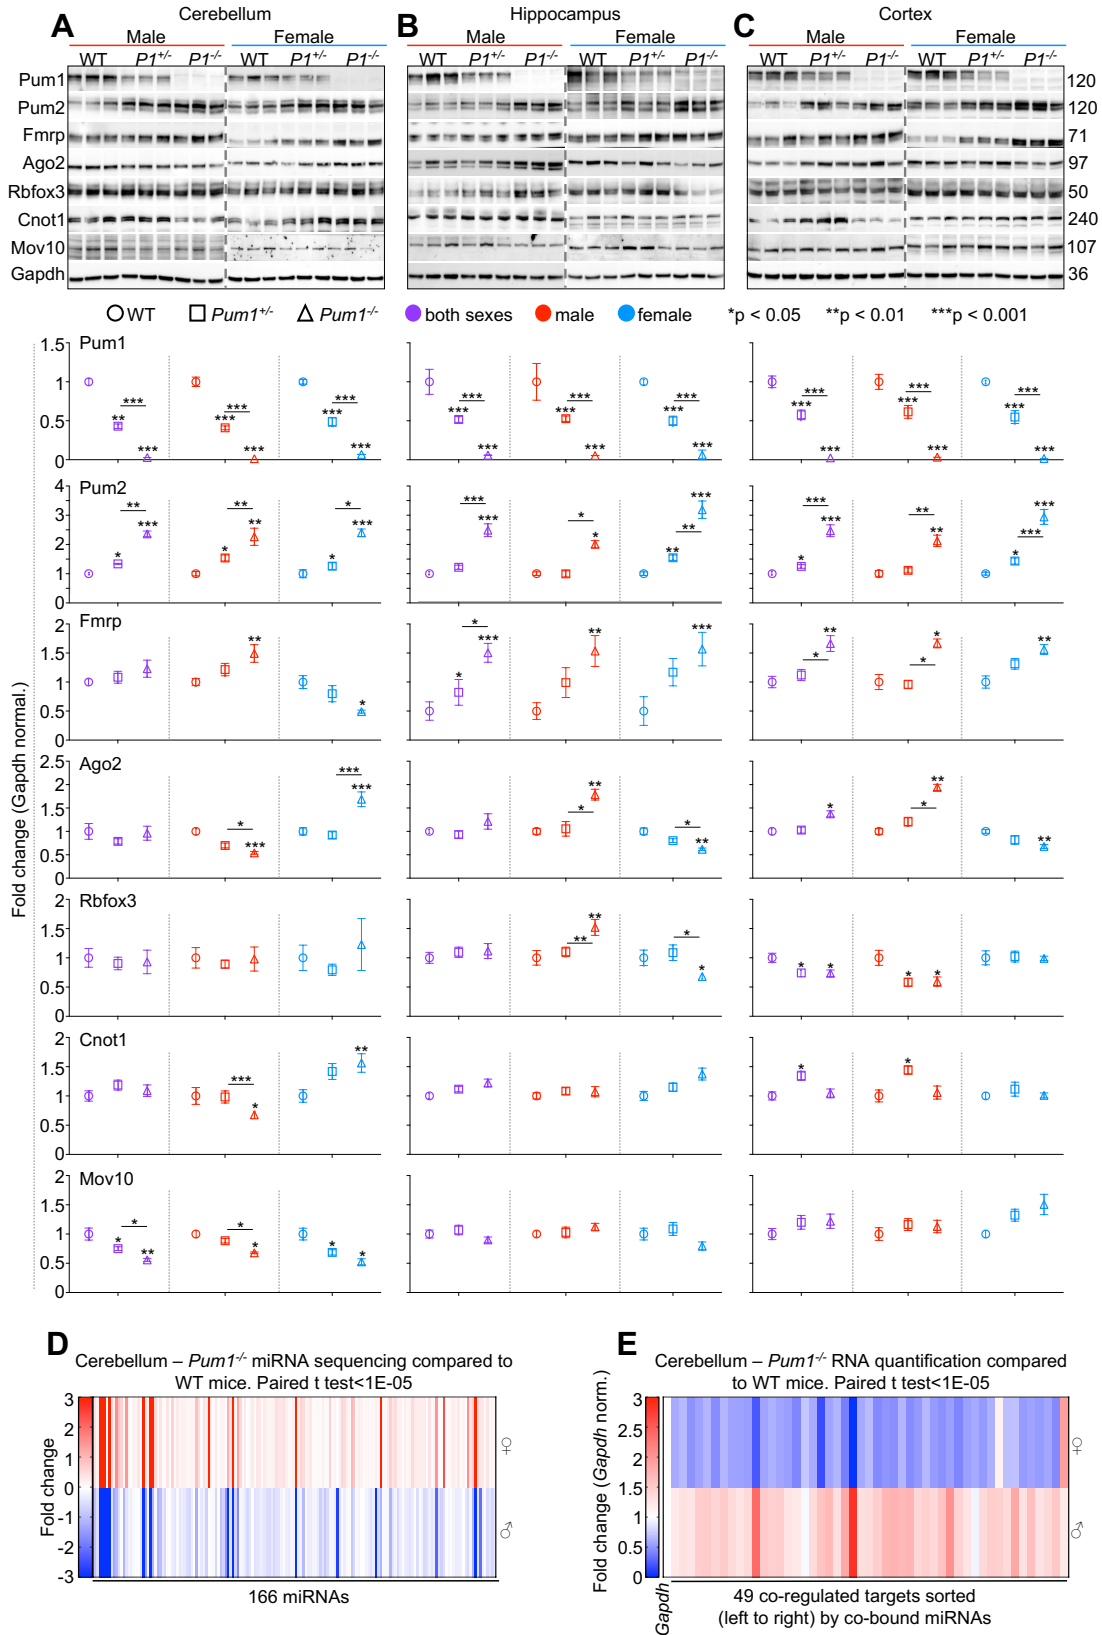

489 **Figure 4. Pum1 interactors and the microRNA machinery show brain region- and sex-specific**  
490 **responses to Pum1 loss.** Representative western blots of Pum1, Pum2, Fmrp, Ago2, Rbfox3, Cnot1, and  
491 Mov10 in (A) cerebellum, (B) hippocampus, and (C) cortex in both male (left panel) and female (right  
492 panel) WT, *Pum1*<sup>+/-</sup>, and *Pum1*<sup>-/-</sup> mice. All the experiments were conducted with equal numbers of 10-  
493 week-old male and female mice per genotype, for a total of at least 12 mice per genotype (data represent  
494 mean ± SEM). Graphs below show quantification for each protein by brain region, sex, and genotype. All  
495 data were normalized to Gapdh protein levels. Data represent mean ± SEM. P values were calculated by  
496 two-tailed Student's t test. \**p* < 0.05, \*\**p* < 0.01, \*\*\**p* < 0.001. P1 indicates Pum1. See Supplemental  
497 Figure 8 for mRNA quantification for each interactor, brain region, and sex. (D) Heatmap showing 166  
498 microRNAs from cerebella of *Pum1*<sup>-/-</sup> male and female mice that were dysregulated (fold change -3 to +3)  
499 relative to wild-type cerebellum. The full list of miRNA names and fold changes are available in  
500 Supplemental Table 3. See Supplemental Figure 9 for male and female miRNA scatter plots. (E) Heatmap  
501 showing mRNA quantification by qPCR for 49 targets co-bound by a minimum of eight dysregulated  
502 miRNAs (>25% change) from panel D. For D and E, three cerebella per genotype and sex were analyzed.  
503 Statistical significance and magnitude of dysregulation are illustrated for both male and female in  
504 Supplemental Figure 10. The entire list of targets predicted to be co-bound by at least two miRNAs is  
505 presented in Supplemental Table 4.

Figure 5

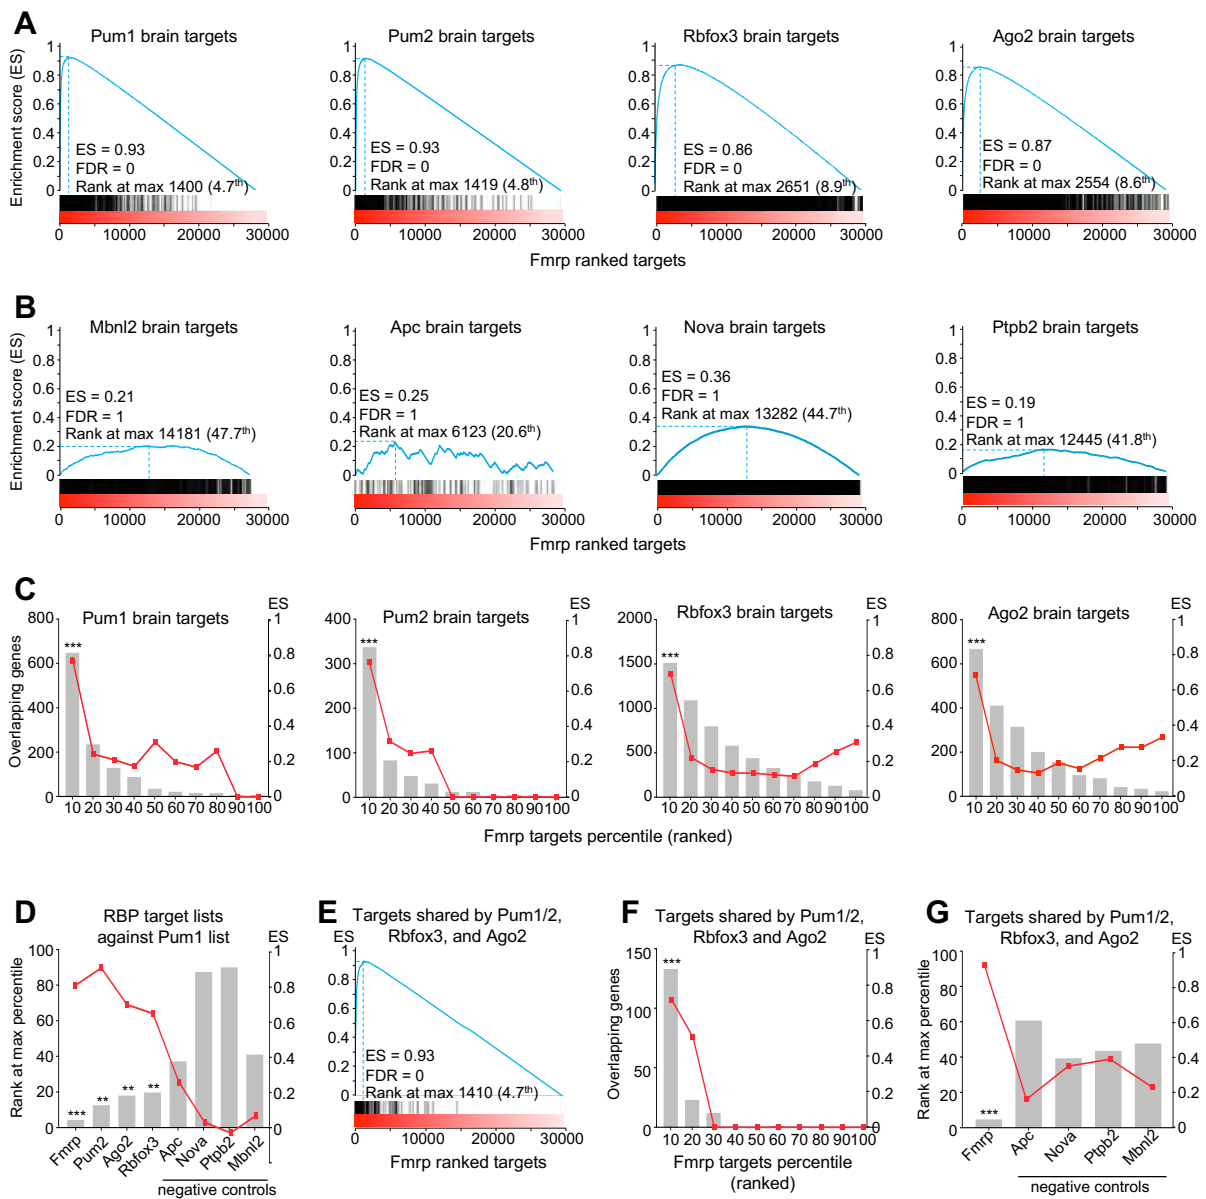

506

507

508 **Figure 5. Pum1 and its RNA-binding protein interactors share many neuronal mRNA targets. (A)**

509 Enrichment plots generated by Gene Set Enrichment Analysis (GSEA) of Pum1, Pum2, Rbfox3, and

510 Ago2 HITS-CLIP targets plotted against Fmrp ranked HITS-CLIP data. Pum1, Pum2, Rbfox3, and Ago2

511 targets are enriched at the top 10<sup>th</sup> percentile of the Fmrp targets with FDR=0. (B) GSEA analysis scores

512 of HITS-CLIP data from each negative control (Apc, Nova, Ptpb2, and Mbnl2) plotted against Fmrp

513 ranked HITS-CLIP data. The negative controls have a maximum enrichment score of 0.36 for Apc

514 ranking at the top 44.7% with FDR=1. **(C)** GSEA analysis scores of Pum1, Pum2, Rbfox3, and Ago2  
515 HITS-CLIP data plotted against Fmrp HITS-CLIP data divided into 10-percentile ranked bins shows the  
516 shared targets are among the top percentiles of targets for each protein. **(D)** GSEA analysis scores of the  
517 HITS-CLIP data for Fmrp, Pum2, Ago2, Rbfox3 and four negative controls (Apc, Nova, Ptpb2, and  
518 Mbnl2) against Pum1 ranked HITS-CLIP data. The targets of Fmrp, Ago2, Pum2, and Rbfox3 are  
519 enriched at the top 5<sup>th</sup> to 18<sup>th</sup> percentile of Pum1 targets. **(E)** GSEA analysis of the shared targets between  
520 Pum1, Pum2, Ago2, and Rbfox3 against Fmrp showing that they are enriched in the top 5<sup>th</sup> percentile of  
521 Fmrp ranked targets. **(F)** Pum1, Pum2, Ago2, and Rbfox3 shared targets plotted against Fmrp ranked  
522 HITS-CLIP targets and divided into 10-percentile bins shows that all of their respective targets are  
523 enriched at the top 10<sup>th</sup> percentile of the Fmrp ranked targets. **(G)** GSEA analysis scores of the targets  
524 shared by Pum1, Pum2, Ago2, and Rbfox3 and the four negative controls (Apc, Nova, Ptpb2, and Mbnl2)  
525 plotted against Fmrp. At best the negative controls are enriched at the top 40% with a maximum ES of  
526 0.41. For all the GSEA analyses, the False Discovery Rate (FDR) was provided by GSEA: \*\*FDR<0.05  
527 and \*\*\*FDR<0.01. ES=Enrichment score (blue line). Note that lowest rank at max percentage indicates  
528 stronger targets in the rank (see Methods). HITS-CLIP data, and the respective rank, were obtained from  
529 the literature and were initially acquired as follows: Pum1 and Pum2 (24), Fmrp (45), Ago2 (46), Rbfox3  
530 (47), Nova (50), Ptpb2 (52), Mbnl2 (49), and Apc (51) (see Methods for more details). The full list of  
531 shared targets is reported in Supplemental Table 5.

532

Figure 6

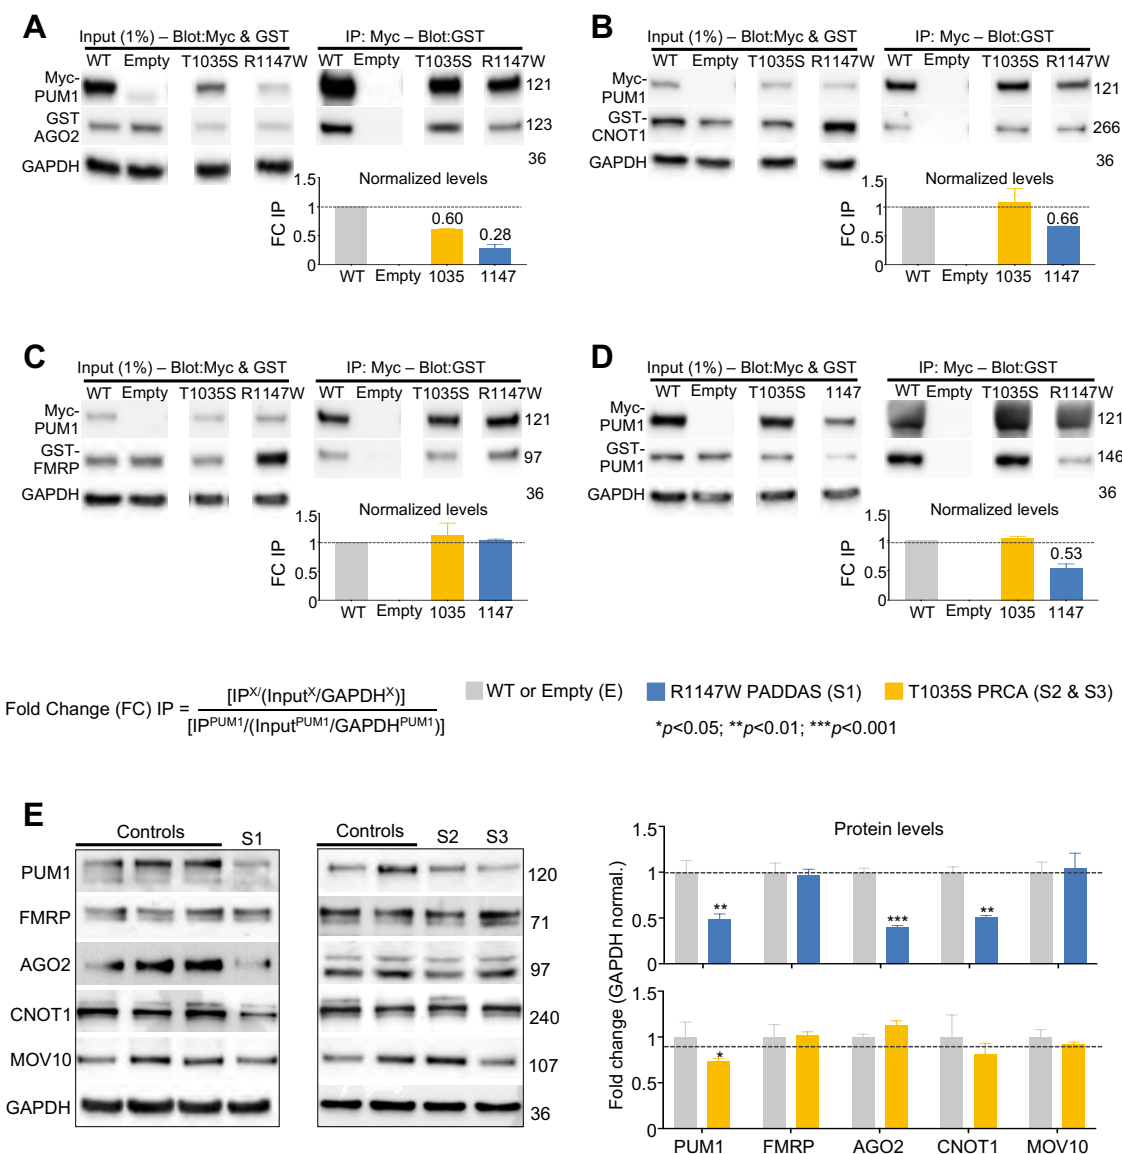

533

534

535 **Figure 6. The R1147W mutation, but not T1035S, destabilizes PUM1 interactors. (A-D)**

536 Representative western blots and relative IP quantification (*bar graphs*) of IP against Myc-PUM1-WT,

537 Myc-PUM1-T1035S (PRCA), or Myc-PUM1-R1147W (PADDAS) followed by immunoblotting for: (A)

538 GST-AGO2, (B) GST-CNOT1, (C) GST-FMRP, and (D) GST-PUM1-WT. Myc- and GST-tagged

539 proteins were co-transfected in HEK293T cells in equal quantities (250ng each). The molecular weights

540 were expressed in kilodaltons (kDa). The amount of protein pulled down compared to IP-PUM1 was

541 quantified as  $[IP^X/(Input^X/GAPDH^X)]/[IP^{PUM1}/(Input^{PUM1}/GAPDH^{PUM1})]$ , where X is the protein of



542 interest. (E) Representative western blots (*left panels*) and relative quantification (*bar graphs to the right*)  
543 of protein levels for PUM1, PUM2, FMRP, AGO2, CNOT1, and MOV10 in PADDAS patient-derived  
544 fibroblasts and PRCA patient-derived lymphoblastoid cells compared to their respective age- and sex-  
545 matched fibroblast (for PADDAS patients) and lymphoblastoid (for PRCA patients) controls. Data were  
546 normalized to Gapdh protein levels. From A to E, all the experiments were performed at least three times.  
547 Data represent mean  $\pm$  SEM. P values were calculated by two-tailed Student's t test. \* $p < 0.05$ , \*\* $p <$   
548 0.01, \*\*\* $p < 0.001$ .  
549

Figure 7

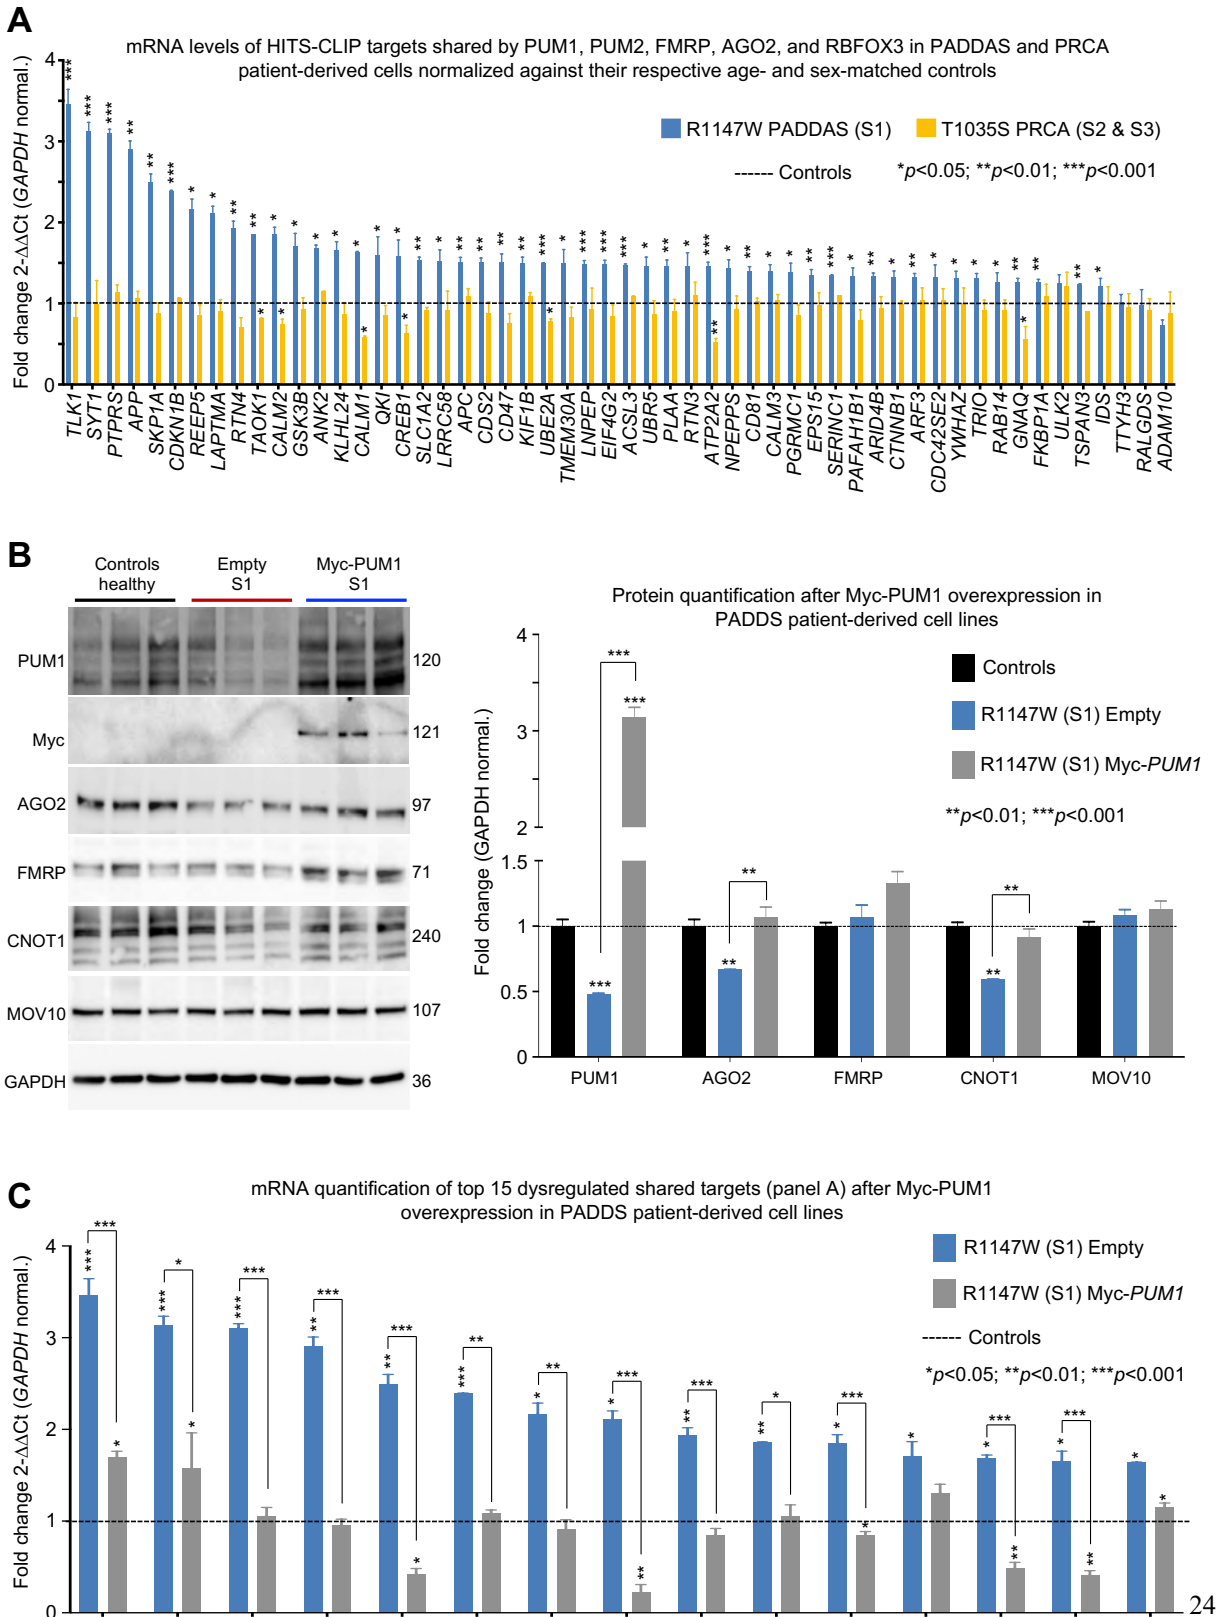

551 **Figure 7. Shared targets are upregulated only in PADDAS, not in PRCA.** (A) mRNA level  
552 quantification of PUM1 neuronal targets in common with FMRP, PUM2, AGO2, and RBFOX3 (Figure  
553 5E and Supplemental Table 5) in fibroblasts from subject 1 (PADDAS patient, R1147W) compared to the  
554 three age- and sex-matched control fibroblast lines (blue bars), and in lymphoblastoid cells from subjects  
555 2 and 3 (PRCA patients, T1035S) compared to the three age- and sex-matched control lymphoblastoid  
556 cell lines (orange bars). Only genes expressed in both fibroblasts and lymphoblasts are represented here  
557 for a total of 54 genes. (B) Representative western blots (*right panel*) and relative quantifications (*left*  
558 *panel*) of PUM1 and its interactors (AGO2, CNOT1, FMRP, and MOV10) in PADDAS fibroblast  
559 patient-derived cell lines after Myc-PUM1-WT expression. (C) mRNA quantification of the top 15 shared  
560 target genes from panel A in PADDAS fibroblast patient-derived cell lines after Myc-PUM1-WT  
561 expression. All data were normalized to GAPDH mRNA or protein levels and experiments were  
562 performed at least three times. Data represent mean  $\pm$  SEM. P values were calculated by two-tailed  
563 Student's t test. \* $p < 0.05$ , \*\* $p < 0.01$ , \*\*\* $p < 0.001$ . The full list of shared targets expressed in fibroblast  
564 and lymphoblast cell lines is reported in Supplemental Table 5.

565

## 566 Methods

567 A detailed description is found in the Supplemental Methods.

568

569 **Ethical statement and mouse strains.** All animal procedures were approved by the Institutional Animal  
570 Care and Use Committee at Columbia University, New York under the protocol AC-AAAU8490. Mice  
571 were maintained on a 12-hr light, 12-hr dark cycle with regular chow and water ad libitum. Pum1 knock-  
572 out mice were generated as previously described (53). C57BL/6J wild-type mice were purchased from  
573 Jackson Laboratory and maintained as described above. For brain dissection, mice were anesthetized with  
574 isoflurane, and the brain rapidly removed from the skull and lysed in the appropriate buffer according to  
575 the experiment (see Materials and Methods Details).

576

577 **Experimental design.** For protein and RNA quantification from patient-derived cell lines, we used values  
578 from at least six independent experiments with three biological replicates for each experiment. At every  
579 stage of the study, the experimenter was blinded to the identity of control and patient-derived cell lines.  
580 For example, for the data regarding both human patient-derived cell lines and mice, Experimenter #1  
581 made a list of samples and controls to be tested, and Experimenter #2 randomized this list and re-labeled  
582 the tubes; Experimenter #2 was the only person with the key to identify the samples. These samples were  
583 then distributed to Experimenter #3 to culture the cells, then to Experimenter #1 to perform western blots

584 and qRT-PCR, and lastly Experimenters #1 and #4 analyzed the data. Only then was the key applied to  
585 identify the samples.

586 For mouse experiments, the experimenters were randomized and blinded as described above. The  
587 number of animals used and sex, and the specific statistical tests used, are indicated for each experiment  
588 in the figure legends. Sample size was based on previous experience using the same mice (11).

589

590 **Software and statistical analysis.** Statistical significance was analyzed using GraphPad Prism 8  
591 (<https://www.graphpad.com/scientific-software/prism/>) and Excel Software (Microsoft). All data are  
592 presented as mean  $\pm$  SEM. Statistical details for each experiment can be found in the figures and the  
593 legends. The range of expression levels in qPCR was determined from at least six independent  
594 experiments with three biological replicates by calculating the standard deviation of the  $\Delta$ Ct (71). The  
595 range of expression levels in western blots was determined from at least six independent experiments with  
596 at least six biological replicates. P values were calculated by Student's T-test or analysis of variance with  
597 Tukey's post hoc analysis. For the IP and protein quantification in patient cell lines in Figure 6E and  
598 Supplemental Figure 13A and B, we had only one PADDAS patient, so the repeated experiments were  
599 technical replicates rather than biological replicates. We therefore calculated the statistical significance  
600 based on these technical replicates in comparison to the three biological replicates (i.e., healthy controls).

601

602 **Study approval.** PADDAS and PRCA patient cell lines are the same as those reported previously (10).  
603 The consent form for each subject specifically allows for sharing of medical information and physical  
604 exam findings; the sharing of cell lines from the PADDAS and PRCA subjects and the controls was  
605 approved under the Columbia University Medical Center IRB-AAAS7401 (Y01M00) and the Baylor  
606 College of Medicine IRB H-34578.

607

## 608 Data Availability

609 **Materials and reagents.** Further information and requests for resources, reagents, and mouse models  
610 used in this manuscript should be directed to and will be fulfilled by Vincenzo A. Gennarino  
611 ([vag2138@cumc.columbia.edu](mailto:vag2138@cumc.columbia.edu)).

612

613 **Code and raw data.** No software was generated for this project. All software used in this study is  
614 publicly available and links are provided as appropriate in different sections of the Materials and  
615 Methods. Mass spectrometry, RNA sequencing and microRNA sequencing raw data generated during this  
616 study are available at PRIDE Archive at <https://www.ebi.ac.uk/pride/archive>, and Gene Expression

617 Omnibus (GEO) at <https://www.ncbi.nlm.nih.gov/geo/> with the accession numbers pending.

618

## 619 References

- 620 1. Hentze MW, Castello A, Schwarzl T, and Preiss T. A brave new world of RNA-binding proteins.  
621 *Nat Rev Mol Cell Biol.* 2018;19(5):327-41.
- 622 2. Keene JD. RNA regulons: coordination of post-transcriptional events. *Nat Rev Genet.*  
623 2007;8(7):533-43.
- 624 3. Dassi E. Handshakes and Fights: The Regulatory Interplay of RNA-Binding Proteins. *Front Mol*  
625 *Biosci.* 2017;4:67.
- 626 4. Mauger O, Lemoine F, and Scheiffle P. Targeted Intron Retention and Excision for Rapid Gene  
627 Regulation in Response to Neuronal Activity. *Neuron.* 2016;92(6):1266-78.
- 628 5. Lukong KE, Chang KW, Khandjian EW, and Richard S. RNA-binding proteins in human genetic  
629 disease. *Trends Genet.* 2008;24(8):416-25.
- 630 6. Humphrey J, Birsa N, Milioto C, McLaughlin M, Ule AM, Robaldo D, et al. FUS ALS-causative  
631 mutations impair FUS autoregulation and splicing factor networks through intron retention. *Nucleic*  
632 *Acids Res.* 2020;48(12):6889-905.
- 633 7. Ravanidis S, Kattan FG, and Doxakis E. Unraveling the Pathways to Neuronal Homeostasis and  
634 Disease: Mechanistic Insights into the Role of RNA-Binding Proteins and Associated Factors. *Int J*  
635 *Mol Sci.* 2018;19(8).
- 636 8. Darnell JC, and Richter JD. Cytoplasmic RNA-binding proteins and the control of complex brain  
637 function. *Cold Spring Harb Perspect Biol.* 2012;4(8):a012344.
- 638 9. Khalil B, Morderer D, Price PL, Liu F, and Rossoll W. mRNP assembly, axonal transport, and local  
639 translation in neurodegenerative diseases. *Brain Res.* 2018;1693(Pt A):75-91.
- 640 10. Gennarino VA, Palmer EE, McDonnell LM, Wang L, Adamski CJ, Koire A, et al. A mild PUM1  
641 mutation is associated with adult-onset ataxia, whereas haploinsufficiency causes developmental  
642 delay and seizures. *Cell.* 2018;172(5):924-36 e11.
- 643 11. Gennarino VA, Singh RK, White JJ, De Maio A, Han K, Kim JY, et al. Pumilio1 haploinsufficiency  
644 leads to SCA1-like neurodegeneration by increasing wild-type Ataxin1 levels. *Cell.*  
645 2015;160(6):1087-98.
- 646 12. Friend K, Campbell ZT, Cooke A, Kroll-Conner P, Wickens MP, and Kimble J. A conserved PUF-  
647 Ago-eEF1A complex attenuates translation elongation. *Nat Struct Mol Biol.* 2012;19(2):176-83.
- 648 13. Kedde M, van Kouwenhove M, Zwart W, Oude Vrielink JA, Elkon R, and Agami R. A Pumilio-  
649 induced RNA structure switch in p27-3' UTR controls miR-221 and miR-222 accessibility. *Nat Cell*

- 650 *Biol.* 2010;12(10):1014-20.
- 651 14. Miles WO, Tschop K, Herr A, Ji JY, and Dyson NJ. Pumilio facilitates miRNA regulation of the  
652 E2F3 oncogene. *Genes Dev.* 2012;26(4):356-68.
- 653 15. Temme C, Simonelig M, and Wahle E. Deadenylation of mRNA by the CCR4-NOT complex in  
654 *Drosophila*: molecular and developmental aspects. *Front Genet.* 2014;5:143.
- 655 16. Van Etten J, Schagat TL, Hrit J, Weidmann CA, Brumbaugh J, Coon JJ, et al. Human Pumilio  
656 proteins recruit multiple deadenylases to efficiently repress messenger RNAs. *J Biol Chem.*  
657 2012;287(43):36370-83.
- 658 17. Weidmann CA, Raynard NA, Blewett NH, Van Etten J, and Goldstrohm AC. The RNA binding  
659 domain of Pumilio antagonizes poly-adenosine binding protein and accelerates deadenylation. *RNA.*  
660 2014;20(8):1298-319.
- 661 18. Goldstrohm AC, Hall TMT, and McKenney KM. Post-transcriptional Regulatory Functions of  
662 Mammalian Pumilio Proteins. *Trends Genet.* 2018;34(12):972-90.
- 663 19. Bohn JA, Van Etten JL, Schagat TL, Bowman BM, McEachin RC, Freddolino PL, et al.  
664 Identification of diverse target RNAs that are functionally regulated by human Pumilio proteins.  
665 *Nucleic Acids Res.* 2018;46(1):362-86.
- 666 20. Uyhazi KE, Yang Y, Liu N, Qi H, Huang XA, Mak W, et al. Pumilio proteins utilize distinct  
667 regulatory mechanisms to achieve complementary functions required for pluripotency and  
668 embryogenesis. *Proc Natl Acad Sci U S A.* 2020;117(14):7851-62.
- 669 21. Marrero E, Rossi SG, Darr A, Tsoulfas P, and Rotundo RL. Translational regulation of  
670 acetylcholinesterase by the RNA-binding protein Pumilio-2 at the neuromuscular synapse. *J Biol*  
671 *Chem.* 2011;286(42):36492-9.
- 672 22. Muraro NI, Weston AJ, Gerber AP, Luschnig S, Moffat KG, and Baines RA. Pumilio binds para  
673 mRNA and requires Nanos and Brat to regulate sodium current in *Drosophila* motoneurons. *J*  
674 *Neurosci.* 2008;28(9):2099-109.
- 675 23. Raudvere U, Kolberg L, Kuzmin I, Arak T, Adler P, Peterson H, et al. g:Profiler: a web server for  
676 functional enrichment analysis and conversions of gene lists (2019 update). *Nucleic Acids Res.*  
677 2019;47(W1):W191-W8.
- 678 24. Zhang M, Chen D, Xia J, Han W, Cui X, Neuenkirchen N, et al. Post-transcriptional regulation of  
679 mouse neurogenesis by Pumilio proteins. *Genes Dev.* 2017;31(13):1354-69.
- 680 25. Enwerem, III, Elrod ND, Chang CT, Lin A, Ji P, Bohn JA, et al. Human Pumilio proteins directly  
681 bind the CCR4-NOT deadenylase complex to regulate the transcriptome. *RNA.* 2021;27(4):445-64.
- 682 26. Blewett NH, and Goldstrohm AC. A eukaryotic translation initiation factor 4E-binding protein



- 683 promotes mRNA decapping and is required for PUF repression. *Mol Cell Biol.* 2012;32(20):4181-  
684 94.
- 685 27. Wamsley B, Jaglin XH, Favuzzi E, Quattrococo G, Nigro MJ, Yusuf N, et al. Rbfox1 Mediates Cell-  
686 type-Specific Splicing in Cortical Interneurons. *Neuron.* 2018;100(4):846-59 e7.
- 687 28. Gehman LT, Meera P, Stoilov P, Shiue L, O'Brien JE, Meisler MH, et al. The splicing regulator  
688 Rbfox2 is required for both cerebellar development and mature motor function. *Genes Dev.*  
689 2012;26(5):445-60.
- 690 29. Kenny PJ, Kim M, Skariah G, Nielsen J, Lannom MC, and Ceman S. The FMRP-MOV10 complex:  
691 a translational regulatory switch modulated by G-Quadruplexes. *Nucleic Acids Res.* 2020;48(2):862-  
692 78.
- 693 30. Kenny PJ, Zhou H, Kim M, Skariah G, Khetani RS, Drnevich J, et al. MOV10 and FMRP regulate  
694 AGO2 association with microRNA recognition elements. *Cell Rep.* 2014;9(5):1729-41.
- 695 31. Singh K, Gaur P, and Prasad S. Fragile x mental retardation (Fmr-1) gene expression is down  
696 regulated in brain of mice during aging. *Mol Biol Rep.* 2007;34(3):173-81.
- 697 32. Singh K, and Prasad S. Differential expression of Fmr-1 mRNA and FMRP in female mice brain  
698 during aging. *Mol Biol Rep.* 2008;35(4):677-84.
- 699 33. Zamore PD, Williamson JR, and Lehmann R. The Pumilio protein binds RNA through a conserved  
700 domain that defines a new class of RNA-binding proteins. *RNA.* 1997;3(12):1421-33.
- 701 34. Agarwal V, Bell GW, Nam JW, and Bartel DP. Predicting effective microRNA target sites in  
702 mammalian mRNAs. *Elife.* 2015;4.
- 703 35. Gennarino VA, D'Angelo G, Dharmalingam G, Fernandez S, Russolillo G, Sanges R, et al.  
704 Identification of microRNA-regulated gene networks by expression analysis of target genes. *Genome*  
705 *Res.* 2012;22(6):1163-72.
- 706 36. Guan X, Chen S, Liu Y, Wang LL, Zhao Y, and Zong ZH. PUM1 promotes ovarian cancer  
707 proliferation, migration and invasion. *Biochem Biophys Res Commun.* 2018;497(1):313-8.
- 708 37. Dai H, Shen K, Yang Y, Su X, Luo Y, Jiang Y, et al. PUM1 knockdown prevents tumor progression  
709 by activating the PERK/eIF2/ATF4 signaling pathway in pancreatic adenocarcinoma cells. *Cell*  
710 *Death Dis.* 2019;10(8):595.
- 711 38. Lee S, Kopp F, Chang TC, Sataluri A, Chen B, Sivakumar S, et al. Noncoding RNA NORAD  
712 Regulates Genomic Stability by Sequestering PUMILIO Proteins. *Cell.* 2016;164(1-2):69-80.
- 713 39. Koopmans F, van Nierop P, Andres-Alonso M, Byrnes A, Cijssouw T, Coba MP, et al. SynGO: An  
714 Evidence-Based, Expert-Curated Knowledge Base for the Synapse. *Neuron.* 2019;103(2):217-34 e4.
- 715 40. Fu J, Peng L, Tao T, Chen Y, Li Z, and Li J. Regulatory roles of the miR-200 family in

716 neurodegenerative diseases. *Biomed Pharmacother.* 2019;119:109409.

717 41. Trumbach D, and Prakash N. The conserved miR-8/miR-200 microRNA family and their role in  
718 invertebrate and vertebrate neurogenesis. *Cell Tissue Res.* 2015;359(1):161-77.

719 42. Keene JD. Biological clocks and the coordination theory of RNA operons and regulons. *Cold Spring*  
720 *Harb Symp Quant Biol.* 2007;72:157-65.

721 43. Keene JD, and Lager PJ. Post-transcriptional operons and regulons co-ordinating gene expression.  
722 *Chromosome Res.* 2005;13(3):327-37.

723 44. Blackinton JG, and Keene JD. Post-transcriptional RNA regulons affecting cell cycle and  
724 proliferation. *Semin Cell Dev Biol.* 2014;34:44-54.

725 45. Maurin T, Lebrigand K, Castagnola S, Paquet A, Jarjat M, Popa A, et al. HITS-CLIP in various  
726 brain areas reveals new targets and new modalities of RNA binding by fragile X mental retardation  
727 protein. *Nucleic Acids Res.* 2018;46(12):6344-55.

728 46. Chi SW, Zang JB, Mele A, and Darnell RB. Argonaute HITS-CLIP decodes microRNA-mRNA  
729 interaction maps. *Nature.* 2009;460(7254):479-86.

730 47. Weyn-Vanhentenryck SM, Mele A, Yan Q, Sun S, Farny N, Zhang Z, et al. HITS-CLIP and  
731 integrative modeling define the Rbfox splicing-regulatory network linked to brain development and  
732 autism. *Cell Rep.* 2014;6(6):1139-52.

733 48. Subramanian A, Tamayo P, Mootha VK, Mukherjee S, Ebert BL, Gillette MA, et al. Gene set  
734 enrichment analysis: a knowledge-based approach for interpreting genome-wide expression profiles.  
735 *Proc Natl Acad Sci U S A.* 2005;102(43):15545-50.

736 49. Charizanis K, Lee KY, Batra R, Goodwin M, Zhang C, Yuan Y, et al. Muscleblind-like 2-mediated  
737 alternative splicing in the developing brain and dysregulation in myotonic dystrophy. *Neuron.*  
738 2012;75(3):437-50.

739 50. Zhang C, Frias MA, Mele A, Ruggiu M, Eom T, Marney CB, et al. Integrative modeling defines the  
740 Nova splicing-regulatory network and its combinatorial controls. *Science.* 2010;329(5990):439-43.

741 51. Preitner N, Quan J, Nowakowski DW, Hancock ML, Shi J, Tcherkezian J, et al. APC is an RNA-  
742 binding protein, and its interactome provides a link to neural development and microtubule  
743 assembly. *Cell.* 2014;158(2):368-82.

744 52. Licatalosi DD, Yano M, Fak JJ, Mele A, Grabinski SE, Zhang C, et al. Ptbp2 represses adult-specific  
745 splicing to regulate the generation of neuronal precursors in the embryonic brain. *Genes Dev.*  
746 2012;26(14):1626-42.

747 53. Chen D, Zheng W, Lin A, Uyhazi K, Zhao H, and Lin H. Pumilio 1 suppresses multiple activators of  
748 p53 to safeguard spermatogenesis. *Curr Biol.* 2012;22(5):420-5.

- 749 54. Bonnemason-Carrere P, Morice-Picard F, Pennamen P, Arveiler B, Fergelot P, Goizet C, et al.  
750 PADDAS syndrome associated with hair dysplasia caused by a de novo missense variant of PUM1.  
751 *Am J Med Genet A*. 2019;179(6):1030-3.
- 752 55. Imaizumi T, Mogami Y, Okamoto N, Yamamoto-Shimajima K, and Yamamoto T. De novo 1p35.2  
753 microdeletion including PUM1 identified in a patient with sporadic West syndrome. *Congenit Anom*  
754 *(Kyoto)*. 2019;59(6):193-4.
- 755 56. Lai KL, Liao YC, Tsai PC, Hsiao CT, Soong BW, and Lee YC. Investigating PUM1 mutations in a  
756 Taiwanese cohort with cerebellar ataxia. *Parkinsonism Relat Disord*. 2019;66:220-3.
- 757 57. Tan Q, and Zoghbi HY. Mouse models as a tool for discovering new neurological diseases.  
758 *Neurobiol Learn Mem*. 2019;165:106902.
- 759 58. Kim K, Hessl D, Randol JL, Espinal GM, Schneider A, Protic D, et al. Association between IQ and  
760 FMR1 protein (FMRP) across the spectrum of CGG repeat expansions. *PLoS One*.  
761 2019;14(12):e0226811.
- 762 59. Chartier-Harlin MC, Kachergus J, Roumier C, Mouroux V, Douay X, Lincoln S, et al. Alpha-  
763 synuclein locus duplication as a cause of familial Parkinson's disease. *Lancet*. 2004;364(9440):1167-  
764 9.
- 765 60. Rovelet-Lecrux A, Hannequin D, Raux G, Le Meur N, Laquerriere A, Vital A, et al. APP locus  
766 duplication causes autosomal dominant early-onset Alzheimer disease with cerebral amyloid  
767 angiopathy. *Nat Genet*. 2006;38(1):24-6.
- 768 61. Takeguchi R, Takahashi S, Kuroda M, Tanaka R, Suzuki N, Tomonoh Y, et al. MeCP2\_e2 partially  
769 compensates for lack of MeCP2\_e1: A male case of Rett syndrome. *Mol Genet Genomic Med*.  
770 2020;8(2):e1088.
- 771 62. Orr HT, and Zoghbi HY. Trinucleotide repeat disorders. *Annu Rev Neurosci*. 2007;30:575-621.
- 772 63. Bah MG, Rodriguez D, Cazeneuve C, Mochel F, Devos D, Suppiej A, et al. Deciphering the natural  
773 history of SCA7 in children. *Eur J Neurol*. 2020;27(11):2267-76.
- 774 64. Tereshchenko A, Magnotta V, Epping E, Mathews K, Espe-Pfeifer P, Martin E, et al. Brain structure  
775 in juvenile-onset Huntington disease. *Neurology*. 2019;92(17):e1939-e47.
- 776 65. Genetic Modifiers of Huntington's Disease C. Identification of Genetic Factors that Modify Clinical  
777 Onset of Huntington's Disease. *Cell*. 2015;162(3):516-26.
- 778 66. Kacher R, Lejeune FX, Noel S, Cazeneuve C, Brice A, Humbert S, et al. Propensity for somatic  
779 expansion increases over the course of life in Huntington disease. *Elife*. 2021;10.
- 780 67. Salcedo-Arellano MJ, Dufour B, McLennan Y, Martinez-Cerdeno V, and Hagerman R. Fragile X  
781 syndrome and associated disorders: Clinical aspects and pathology. *Neurobiol Dis*.

- 782 2020;136:104740.
- 783 68. Shah S, Molinaro G, Liu B, Wang R, Huber KM, and Richter JD. FMRP Control of Ribosome  
784 Translocation Promotes Chromatin Modifications and Alternative Splicing of Neuronal Genes  
785 Linked to Autism. *Cell Rep.* 2020;30(13):4459-72 e6.
- 786 69. Conboy JG. Developmental regulation of RNA processing by Rbfox proteins. *Wiley Interdiscip Rev*  
787 *RNA.* 2017;8(2).
- 788 70. Smidak R, Sialana FJ, Kristofova M, Stojanovic T, Rajcic D, Malikovic J, et al. Reduced Levels of  
789 the Synaptic Functional Regulator FMRP in Dentate Gyrus of the Aging Sprague-Dawley Rat. *Front*  
790 *Aging Neurosci.* 2017;9:384.
- 791 71. Pfaffl MW. A new mathematical model for relative quantification in real-time RT-PCR. *Nucleic*  
792 *Acids Res.* 2001;29(9):e45.
- 793

## Supplemental figures

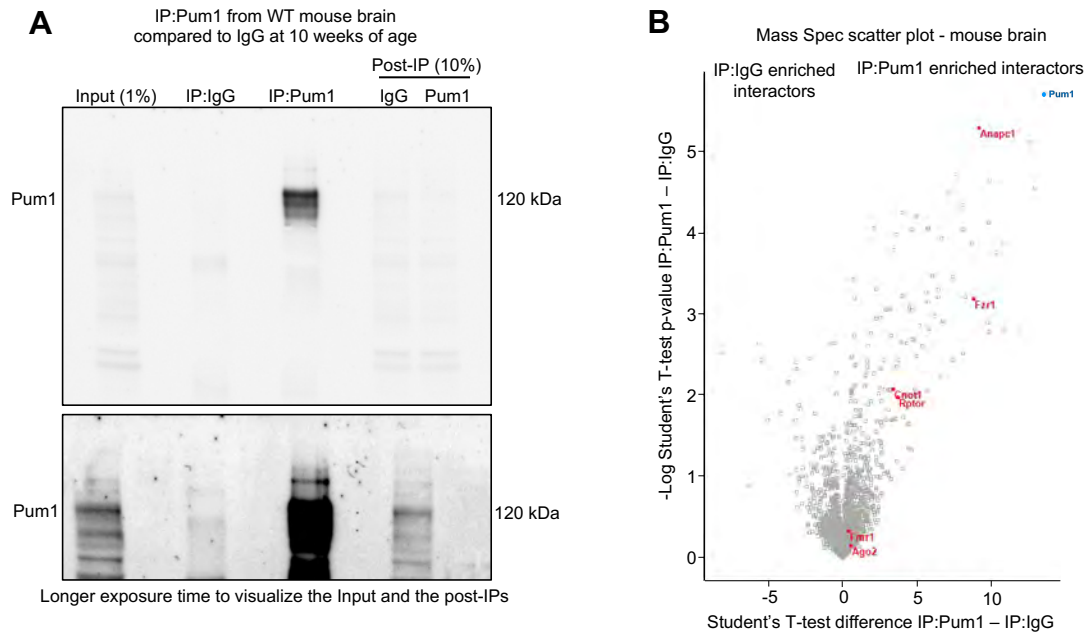

**Supplemental Figure 1. Pumilio1 antibody efficiency.** (A) Pre-IP, IP, and post-IP against Pum1 and IgG from wild-type mouse brain. Even at very long exposure, the post-IP Pum1 lane has no residual band at 120 kDa even though 10 times more protein is loaded than Input. This demonstrates the high efficiency of the Pum1 antibody, which makes it suitable for IP mass spec. The numbers on the right show molecular weight in kilodaltons (kDa). (B) Volcano plot analysis showing all the proteins pulled down by IP against IgG and Pum1 from mouse brain.

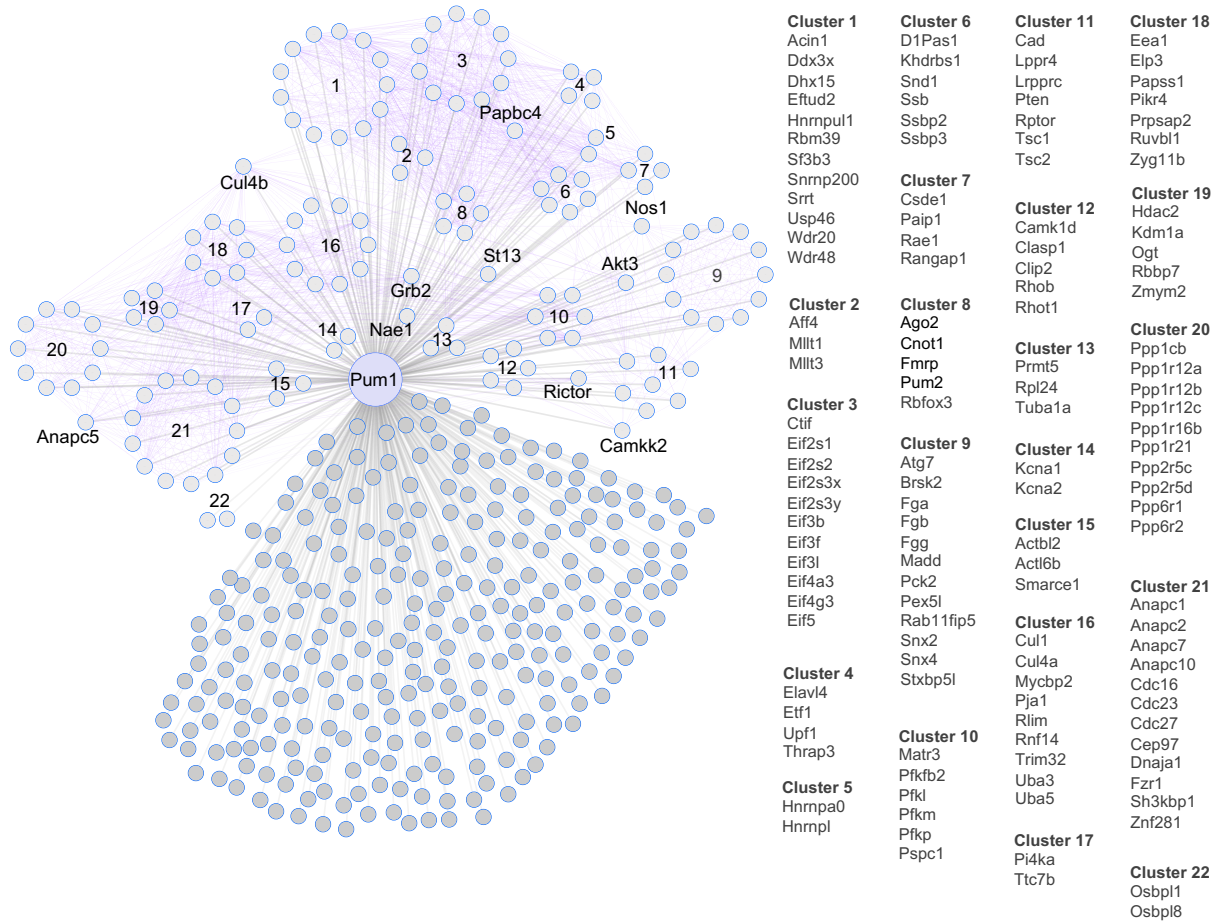

**Supplemental Figure 2. A brain-specific Pum1 interactome.** Network of putative Pum1 interactors in 10-week-old mouse brain (circles connected to Pum1 by gray lines). Interactions between interactors (purple lines) were inferred by g:GOST from Corum and the Human Protein Atlas (see Methods). The proteins in each of the 22 clusters are listed to the right. We combined and homogenized whole brains from two 10-week-old wild-type mice per sample (1 female and 1 male), aliquoting half of each sample for IP against either Pum1 or IgG, then performed six biological replicates (six samples, 12 mice total) for each mass spec experiment against IP-Pum1 and IP-IgG. All putative Pum1 interactors are listed in Supplemental Table 1.

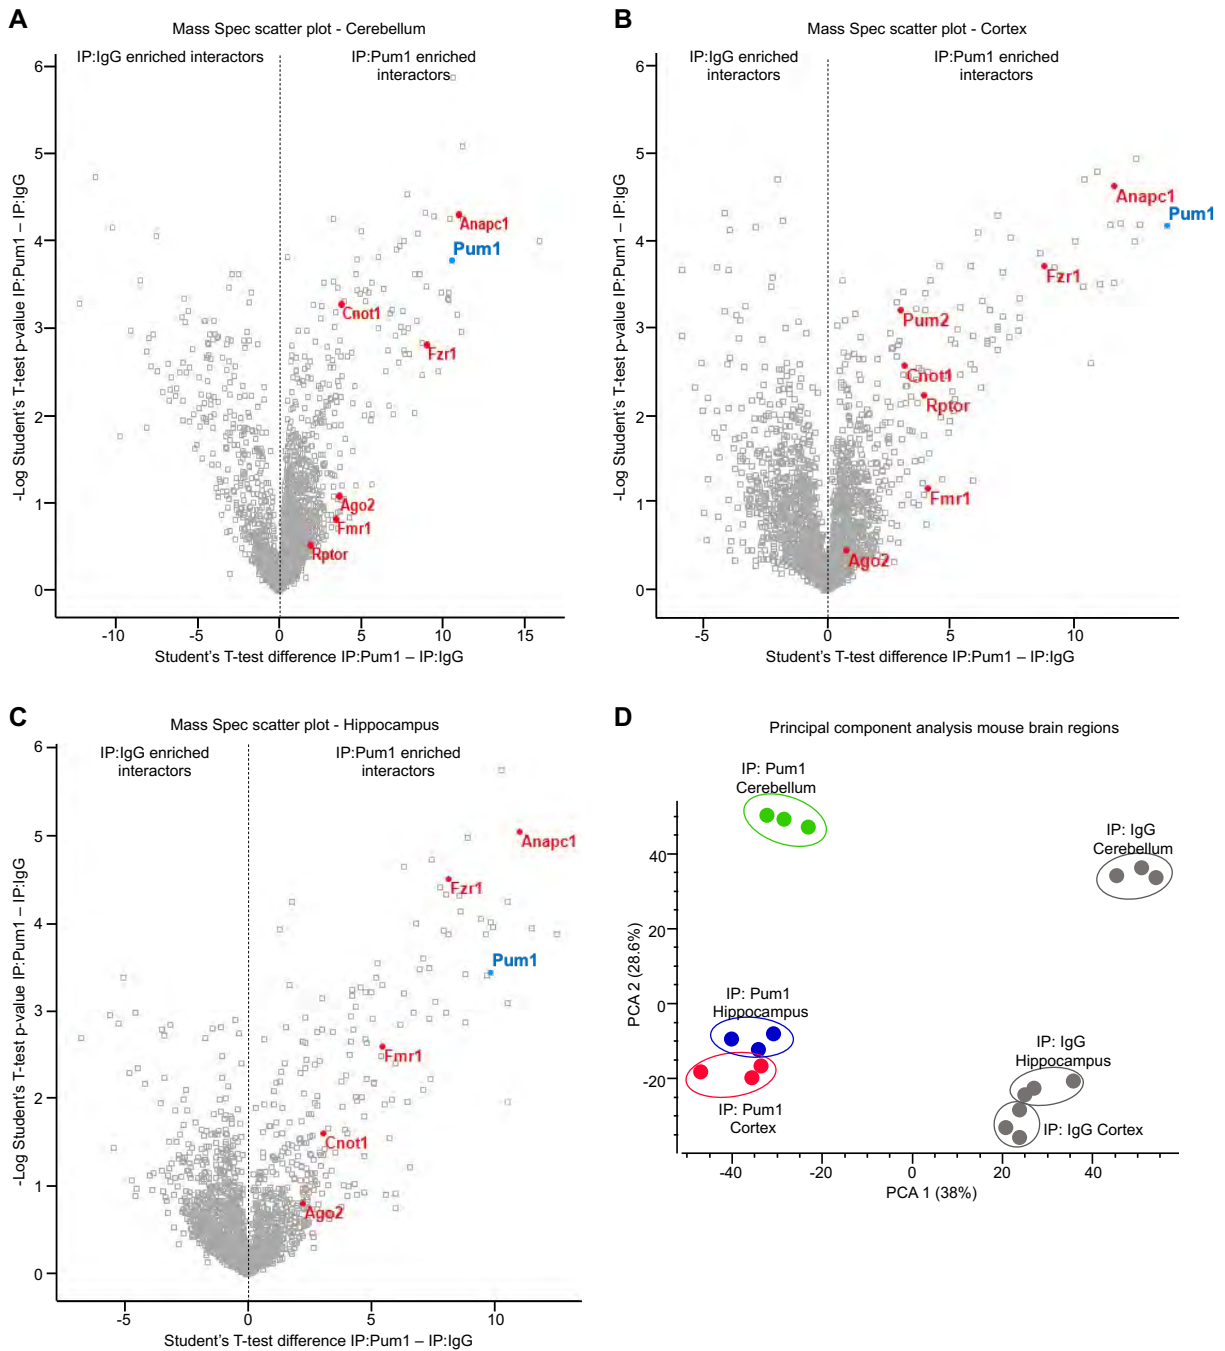

**Supplemental Figure 3. Volcano plot and PCA analyses of IP:Pum1 followed by mass spectrometry in cerebellum, hippocampus, and cortex.** (A-C) Volcano plots show all the proteins pulled down by IP against IgG and Pum1 from (A) cerebellum, (B) cortex, and (C) hippocampus at 10 weeks of age. (D) Principal component analysis (PCA) of IP-Pum1 followed by mass spectrometry (MS) in cortex, hippocampus, and cerebellum from WT mice. IP against IgG was used as a negative control. Each dot represents a total of 3 samples processed by MS for each brain region. All putative Pum1 interactors are listed in Supplemental Table 1.

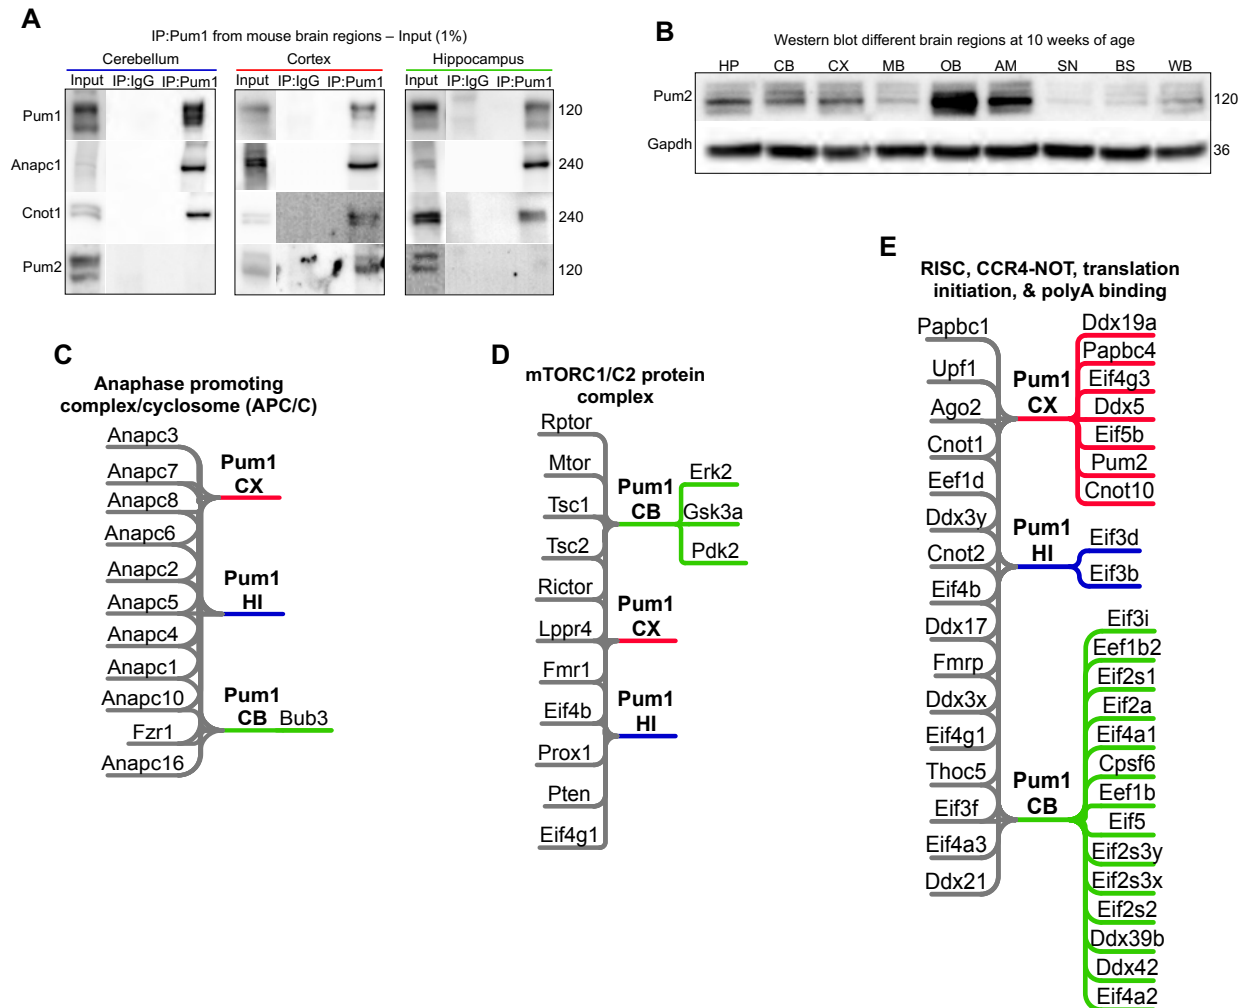

**Supplemental Figure 4. Pum1 interactors can differ by brain region.** (A) Immunoblot for Pum1 (positive control), Anapc1, Cnot1 and Pum2. While Cnot1 and Anapc1 can be pulled down from all three brain regions, Pum2 can only be pulled down from cortex. All experiments performed in triplicate. Cerebellar and cortical tissues: n=8 wild-type mice (4 male and 4 female), for a total of 24 mice. Hippocampus: n=10 wild-type mice (5 female and 5 male), for a total of 30 mice. All mice were 10 weeks of age. IP against IgG was used as a negative control. Molecular protein weights are expressed in kilodaltons (kDa). (B) Western blot analysis at 10 weeks of age to evaluate Pum2 expression levels in eight different brain regions as well as whole brain. Pum2 is highly expressed in olfactory bulbs and amygdala, and expressed at similar levels in hippocampus, cerebellum, and cortex. HP: hippocampus; CB: cerebellum; CX: cortex; MB: midbrain; OB: olfactory bulbs; AM: amygdala; SN: substantia nigra pars compacta; BS: brain stem; WB: whole brain. All the experiments were repeated at least three times. (C-E) The three most enriched protein complexes among the Pum1 interactors for each brain region are shown in (C) for the anaphase promoting complex/cyclosome (APC/C); (D) for the mTOR pathway; (E) for RNA-silencing (RISC), CCR4-NOT, translation initiation and polyA binding. Edge colors (C-E) represent a specific brain region: red for cortex, green for cerebellum, blue for hippocampus, and gray for proteins in common between two or more brain regions.



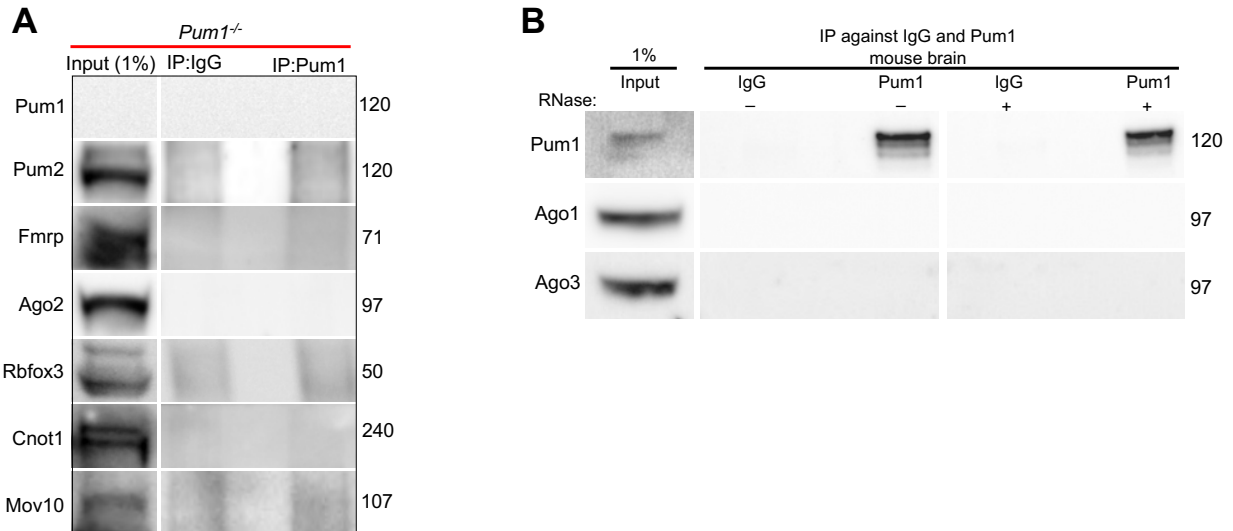

**Supplemental Figure 5. Immunoprecipitation (IP) against Pum1 from whole brain in *Pum1*<sup>-/-</sup> mice.** (A) IP against Pum1 in *Pum1*<sup>-/-</sup> mouse demonstrates the complete absence of Pum1 and thus the specificity of the anti-Pum1 antibody. IP against IgG was used as a negative control, and Input (1% from the initial protein lysate) as a loading control. (B) IP against Pum1 (with or without RNase treatment) shows no interaction with Ago1 or Ago3 in the mouse brain. These lanes are from the same experiment shown in Figure 2A, so the Pum1 row is precisely the same. Molecular weights at the right are in kilodaltons (kDa). All the experiments were repeated at least three times. IP against IgG was used as a negative control, and Input (1% from the initial protein lysate) as a loading control. Equal numbers of male and female mice were sacrificed at 10 weeks of age.

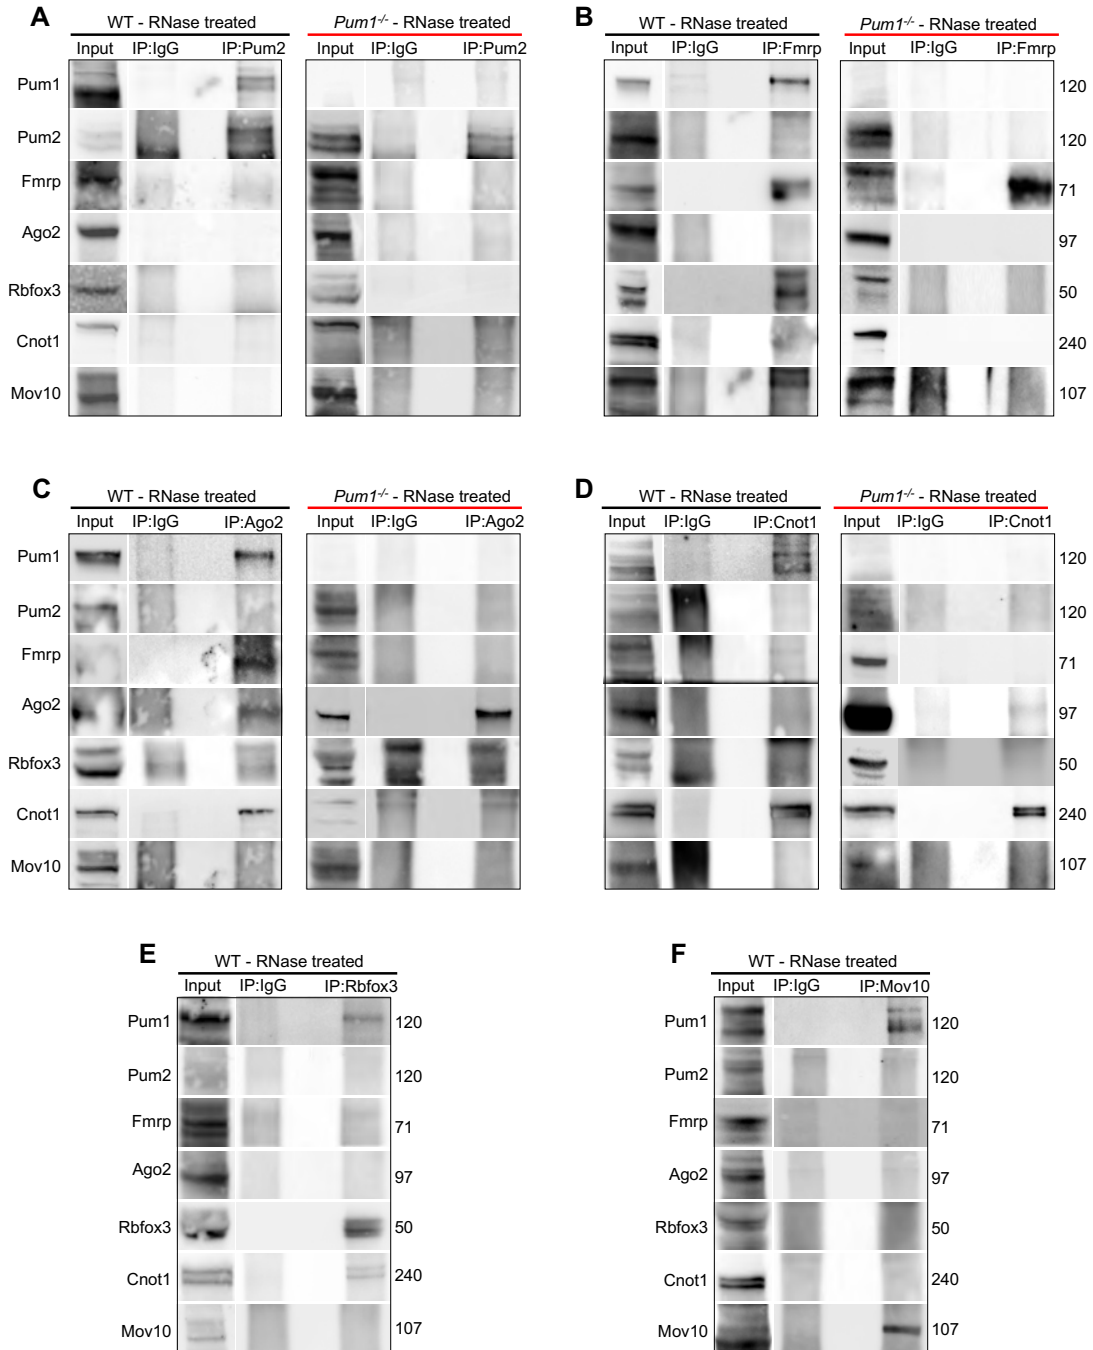

**Supplemental Figure 6. Immunoprecipitation (IP) against Pum1 interactors from whole brain in wild-type and *Pum1*<sup>-/-</sup> mice with RNase treatment.** (A-F) Representative western blots of the proteins pulled down by (A) Pum2, (B) Fmrp, (C) Ago2, (D) Cnot1, (E) Rbfox3, and (F) Mov10 from wild-type (WT, left panel) and *Pum1*<sup>-/-</sup> (right panel) mouse brain. IP against IgG was used as a negative control, and Input (1% from the initial protein lysate) as a loading control. Molecular weights at the right are in kilodaltons (kDa). All the experiments were repeated at least three times. IP against IgG was used as a negative control, and Input (1% from the initial protein lysate) as a loading control. Equal numbers of male and female mice were sacrificed at 10 weeks of age.

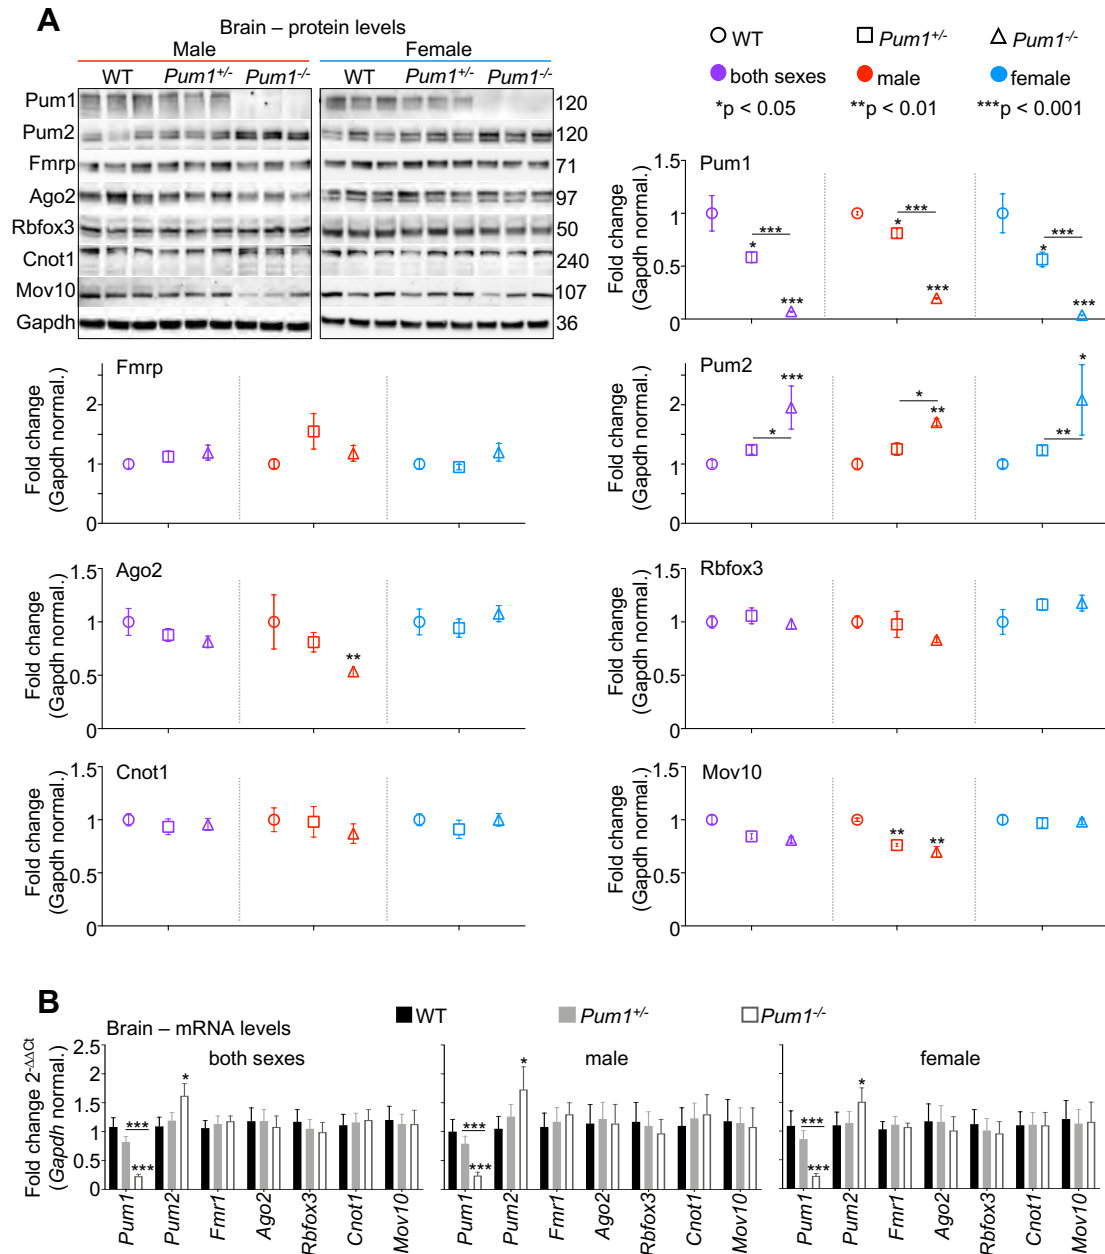

**Supplemental Figure 7. Protein and mRNA quantification from WT, *Pum1*<sup>+/-</sup> and *Pum1*<sup>-/-</sup> mouse brains.** (A) Representative western blot with relative quantifications of Pum1, Pum2, Fmrp, Ago2, Rbfox3, Cnot1, and Mov10 from whole brains of WT, *Pum1*<sup>+/-</sup> and *Pum1*<sup>-/-</sup> mice. All data were normalized to Gapdh protein levels. The numbers on the right are the respective molecular weights expressed in kilodaltons (kDa). (B) mRNA level quantification by qPCR of *Pum1*, *Pum2*, *Fmrp*, *Ago2*, *Rbfox3*, *Cnot1*, and *Mov10* from whole brains of WT, *Pum1*<sup>+/-</sup> and *Pum1*<sup>-/-</sup> mice. Again, all data were normalized to *Gapdh* mRNA levels. All the experiments were conducted with equal number of male (at least 6 per genotype) and female (at least 6 per genotype) mice at 10 weeks of age, for a total of at least 12 mice per genotype (data represent mean ± SEM). The *p* values were calculated by the Student's *t* test. \**p* < 0.05, \*\**p* < 0.01, \*\*\**p* < 0.001.

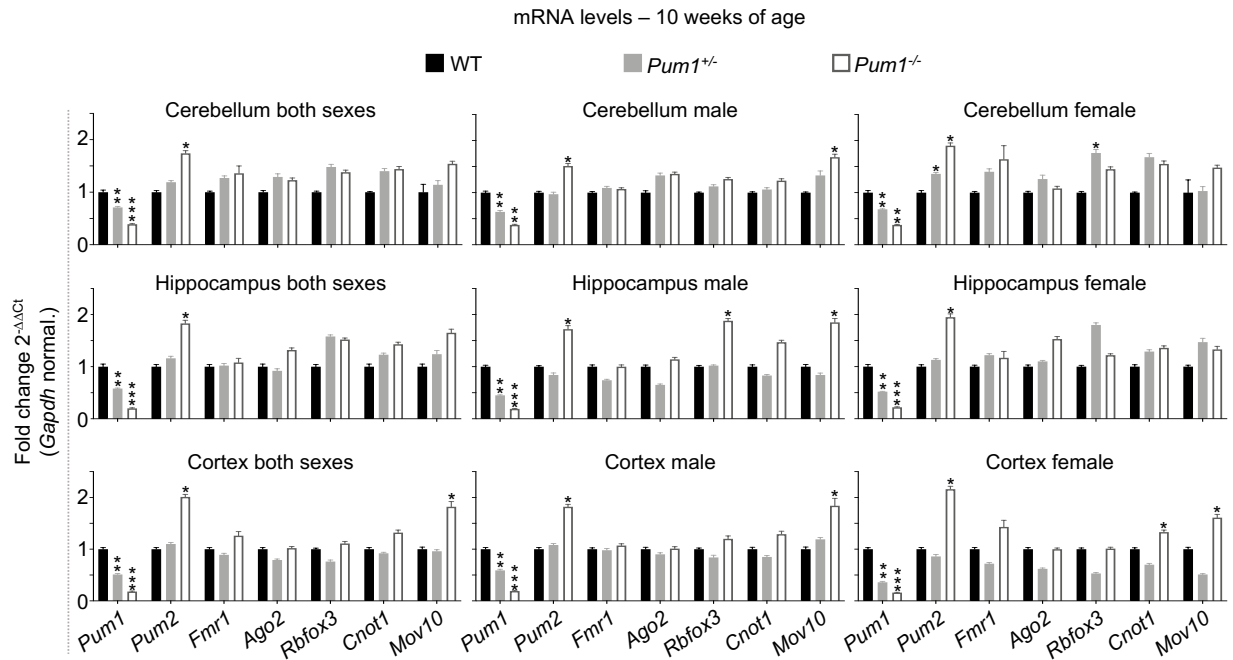

**Supplemental Figure 8. mRNA quantification of *Pum1* interactors by brain region and sex in WT, *Pum1*<sup>+/-</sup> and *Pum1*<sup>-/-</sup> mice.** mRNA levels in cerebellum, hippocampus, and cortex in male and female for all the validated *Pum1* interactors. The same number of mice were used here as in **Figure 4A-C** for a total of at least 12 mice per genotype and sex at 10 weeks of age. All data were normalized to *Gapdh* mRNA levels. All the experiments were performed at least six times (data represent mean  $\pm$  SEM). The *p* values were calculated by the Student's *t* test. \**p* < 0.05, \*\**p* < 0.01, \*\*\**p* < 0.001.

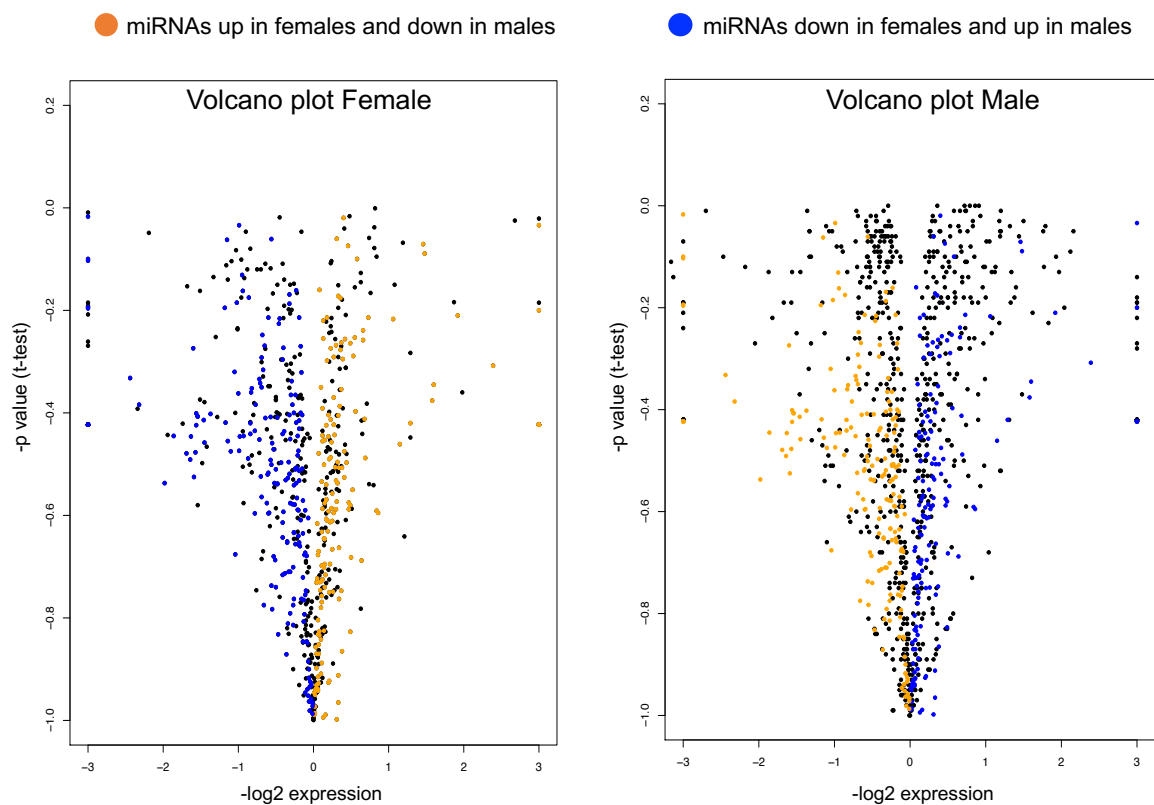

**Supplemental Figure 9. Volcano plots representing all the miRNAs sequenced by miRNAseq in male and female.** Volcano plots show the expression profile for all the miRNAs in male and female *Pum1*<sup>-/-</sup> mice compared to WT at 10 weeks of age. The orange dots represent the miRNAs upregulated in female and downregulated in males; the blue dots represent the miRNAs downregulated in female and upregulated in males. miRNAseq was performed in triplicate (see Methods).

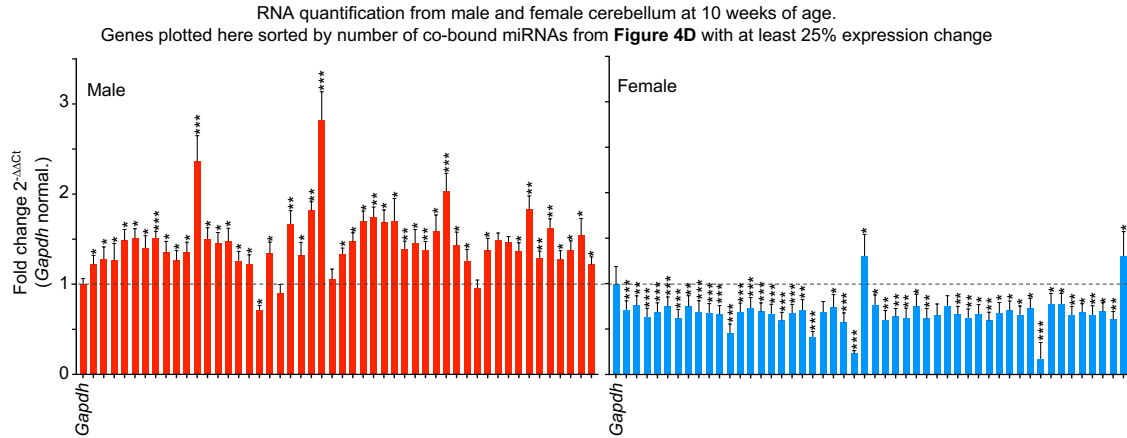

Table showing the order of gene represented in the figure above starting from *Gapdh* as represented in Figure 4E

| Position in the graph | Gene           | Male  | Female | Error_Male | Error_Female | Co-bound miRNAs |
|-----------------------|----------------|-------|--------|------------|--------------|-----------------|
| 1                     | <i>Gapdh</i>   | 1.000 | 1.000  | 0.065      | 0.188        | 11              |
| 2                     | <i>Aak1</i>    | 1.222 | 0.714  | 0.099      | 0.096        | 11              |
| 3                     | <i>Plekhm3</i> | 1.283 | 0.764  | 0.132      | 0.102        | 11              |
| 4                     | <i>Zbtb20</i>  | 1.268 | 0.636  | 0.185      | 0.093        | 10              |
| 5                     | <i>Ago3</i>    | 1.485 | 0.686  | 0.122      | 0.102        | 10              |
| 6                     | <i>Dgkh</i>    | 1.511 | 0.751  | 0.106      | 0.103        | 10              |
| 7                     | <i>Fto</i>     | 1.407 | 0.618  | 0.132      | 0.097        | 10              |
| 8                     | <i>Grin2b</i>  | 1.517 | 0.749  | 0.071      | 0.117        | 10              |
| 9                     | <i>Lpp</i>     | 1.353 | 0.689  | 0.124      | 0.123        | 10              |
| 10                    | <i>Stx17</i>   | 1.266 | 0.682  | 0.108      | 0.098        | 10              |
| 11                    | <i>Acvr2b</i>  | 1.359 | 0.668  | 0.108      | 0.092        | 9               |
| 12                    | <i>Ap5m1</i>   | 2.366 | 0.456  | 0.282      | 0.101        | 9               |
| 13                    | <i>Chi1</i>    | 1.506 | 0.691  | 0.121      | 0.094        | 9               |
| 14                    | <i>Gpr161</i>  | 1.457 | 0.735  | 0.118      | 0.113        | 9               |
| 15                    | <i>Kcnn3</i>   | 1.477 | 0.694  | 0.145      | 0.094        | 9               |
| 16                    | <i>Klf7</i>    | 1.262 | 0.670  | 0.103      | 0.103        | 9               |
| 17                    | <i>Nfat5</i>   | 1.228 | 0.598  | 0.099      | 0.086        | 9               |
| 18                    | <i>Plkna4</i>  | 0.712 | 0.680  | 0.051      | 0.092        | 9               |
| 19                    | <i>Slc1a2</i>  | 1.344 | 0.713  | 0.125      | 0.111        | 9               |
| 20                    | <i>Slc8a1</i>  | 0.904 | 0.417  | 0.094      | 0.056        | 9               |
| 21                    | <i>Ston2</i>   | 1.669 | 0.690  | 0.148      | 0.114        | 9               |
| 22                    | <i>Tsc22d2</i> | 1.319 | 0.743  | 0.146      | 0.137        | 9               |
| 23                    | <i>Xkr4</i>    | 1.823 | 0.573  | 0.093      | 0.105        | 9               |
| 24                    | <i>A1cf</i>    | 2.821 | 0.232  | 0.314      | 0.031        | 8               |
| 25                    | <i>Aff4</i>    | 1.053 | 1.304  | 0.116      | 0.238        | 8               |
| 26                    | <i>Cistn2</i>  | 1.340 | 0.768  | 0.062      | 0.109        | 8               |
| 27                    | <i>Cnnm2</i>   | 1.475 | 0.605  | 0.097      | 0.099        | 8               |
| 28                    | <i>Csnk1a1</i> | 1.698 | 0.641  | 0.115      | 0.087        | 8               |
| 29                    | <i>Ctdspl2</i> | 1.749 | 0.624  | 0.108      | 0.108        | 8               |
| 30                    | <i>Dcaf7</i>   | 1.685 | 0.750  | 0.141      | 0.132        | 8               |
| 31                    | <i>Fmn13</i>   | 1.705 | 0.620  | 0.246      | 0.106        | 8               |
| 32                    | <i>Frm4a</i>   | 1.394 | 0.654  | 0.085      | 0.123        | 8               |
| 33                    | <i>Grin2a</i>  | 1.459 | 0.755  | 0.148      | 0.112        | 8               |
| 34                    | <i>Hipk2</i>   | 1.381 | 0.662  | 0.094      | 0.088        | 8               |
| 35                    | <i>Kif26b</i>  | 1.588 | 0.627  | 0.181      | 0.094        | 8               |
| 36                    | <i>Klf12</i>   | 2.030 | 0.668  | 0.202      | 0.101        | 8               |
| 37                    | <i>Lmln</i>    | 1.435 | 0.595  | 0.143      | 0.091        | 8               |
| 38                    | <i>Lrrc40</i>  | 1.262 | 0.679  | 0.126      | 0.113        | 8               |
| 39                    | <i>Myo5a</i>   | 0.958 | 0.707  | 0.089      | 0.102        | 8               |
| 40                    | <i>Nav2</i>    | 1.377 | 0.658  | 0.135      | 0.097        | 8               |
| 41                    | <i>Psd3</i>    | 1.493 | 0.728  | 0.076      | 0.110        | 8               |
| 42                    | <i>Ptbp2</i>   | 1.463 | 0.177  | 0.068      | 0.177        | 8               |
| 43                    | <i>Rim1a</i>   | 1.368 | 0.779  | 0.092      | 0.112        | 8               |
| 44                    | <i>Snx30</i>   | 1.833 | 0.781  | 0.147      | 0.112        | 8               |
| 45                    | <i>Taok1</i>   | 1.290 | 0.660  | 0.078      | 0.088        | 8               |
| 46                    | <i>Zbtb10</i>  | 1.624 | 0.686  | 0.102      | 0.092        | 8               |
| 47                    | <i>Apbb2</i>   | 1.278 | 0.660  | 0.094      | 0.097        | 8               |
| 48                    | <i>Acap2</i>   | 1.374 | 0.697  | 0.107      | 0.093        | 8               |
| 49                    | <i>Acer2</i>   | 1.544 | 0.610  | 0.187      | 0.083        | 8               |
| 50                    | <i>Aebp2</i>   | 1.219 | 1.904  | 0.085      | 0.269        | 8               |

**Supplemental Figure 10. mRNA quantification of the 49 targets co-bound by at least eight dysregulated miRNAs in mouse cerebellum.** qPCR in cerebellum of male (*left*, red) and female (*right*, blue) mice at 10 weeks of age for the 49 targets co-bound by at least eight dysregulated miRNAs (with minimum 25% change in expression) from Figure 4E and Supplemental Table 4. All the experiments were performed in triplicate for both male and female (data represent mean  $\pm$  SEM). The *p* values were calculated by two-tailed Student's *t* test. \**p* < 0.05, \*\**p* < 0.01, \*\*\**p* < 0.001.

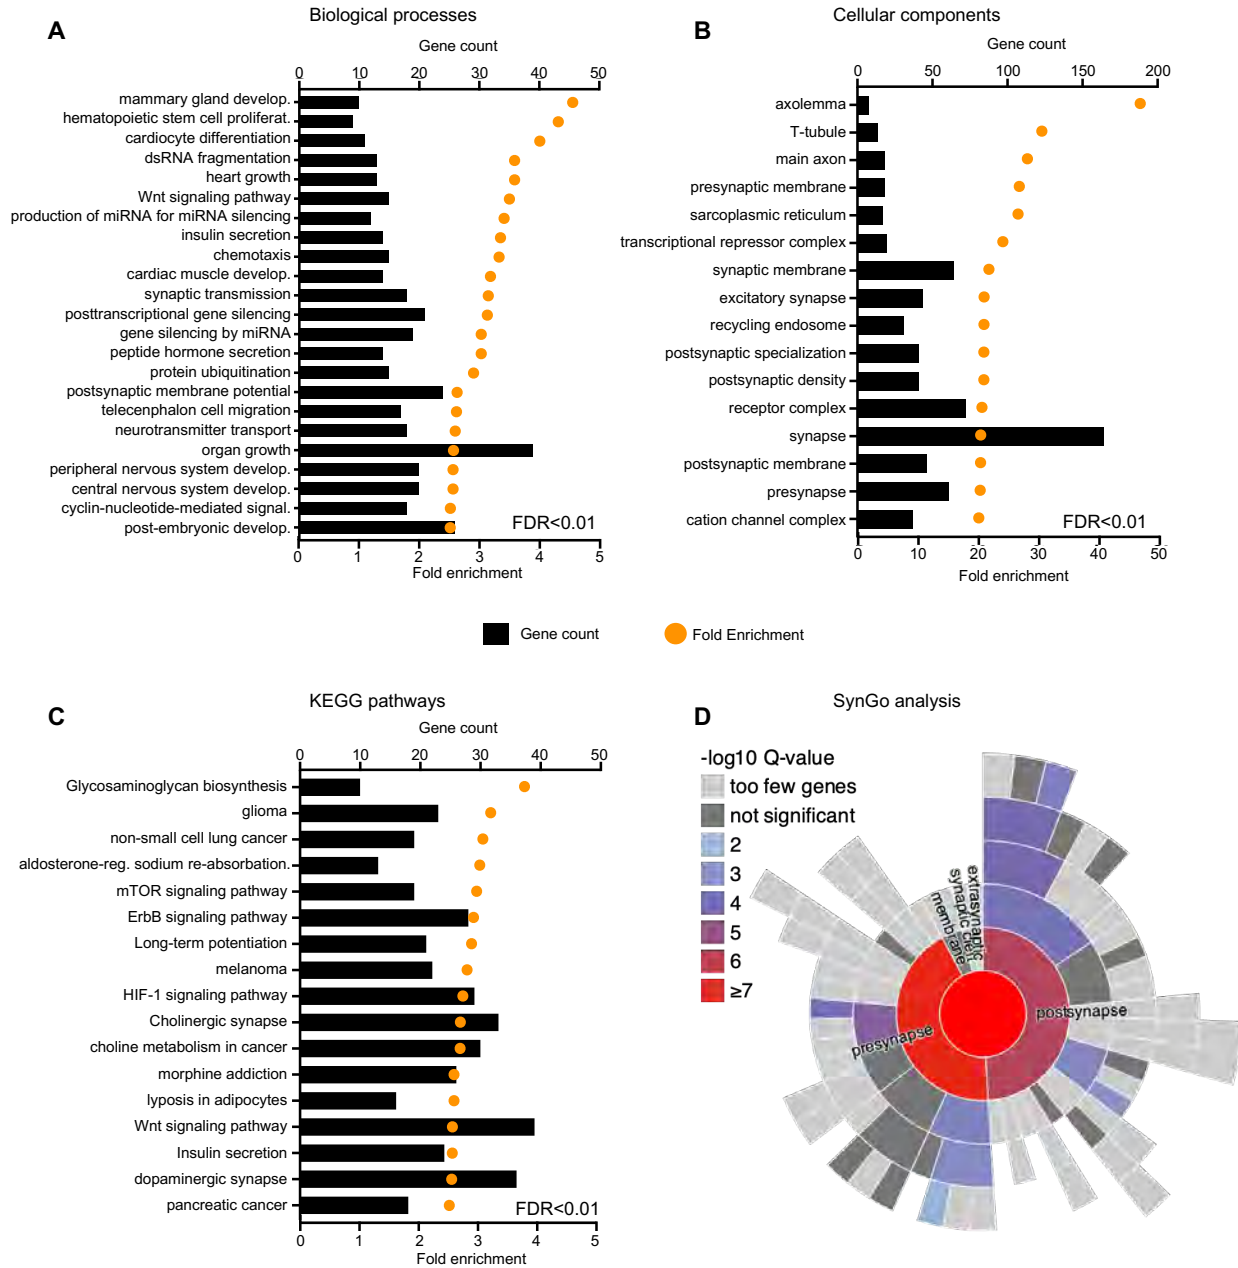

**Supplemental Figure 11. Gene ontology analysis for all targets predicted by CoMeTa and TargetScan that are co-bound by at least four miRNAs.** (A-C) David Gene Ontology representing the enriched (A) biological processes, (B) cellular components, and (C) KEGG pathways for all the targets co-bound by at least four miRNAs. For this analysis we set  $FDR < 0.01$  and a fold-enrichment  $> 2$ . (D) Synaptic Gene Ontology (SynGO) predicts that 117 targets are presynaptic and 124 are postsynaptic with a  $\log_{10}Q$  value  $\geq 5$ .

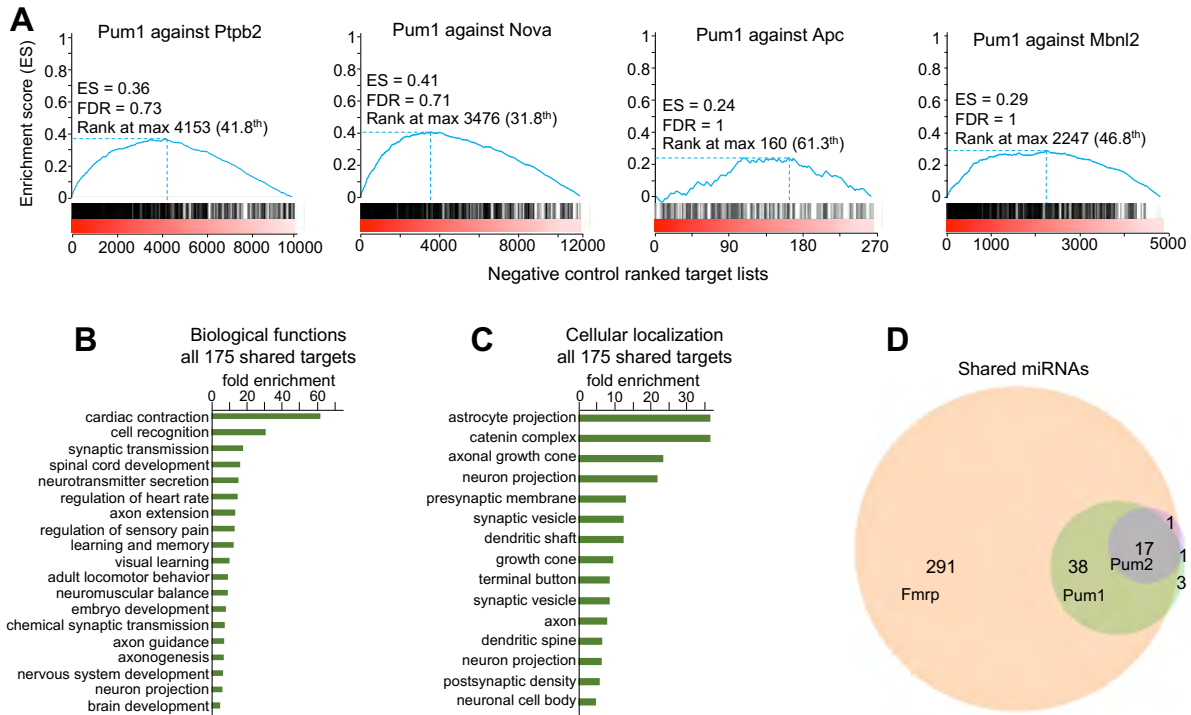

**Supplemental Figure 12. GSEA and Gene Ontology data pertaining to Figure 5.** (A) Gene Set Enrichment Analysis (GSEA) of Pum1 HITS-CLIP data plotted against HITS-CLIP data from the negative controls (RBPs that did not show up in the Pum1 interactome: Ptpb2, Nova, Apc, and Mbnl2) reveals no significant enrichment. (B-C) Gene ontology analysis of the HITS-CLIP targets shared between Pum1, Pum2, Fmrp, Ago2, and Rbfox3 reveals enrichment for certain (B) biological functions and (C) cellular localization. Only categories with FDR<0.05 and fold enrichment > 5 were plotted in B and C. (D) Venn diagram of miRNAs identified by Pum1 and Pum2 shows almost 100% overlap with the miRNAs pulled down by Fmrp HITS-CLIP. For full list of shared miRNAs see Supplemental Table 6. For all GSEA analyses the False Discovery Rate (FDR) was provided by GSEA, \*\*\*FDR < 0.01. ES=Enrichment score (blue line).



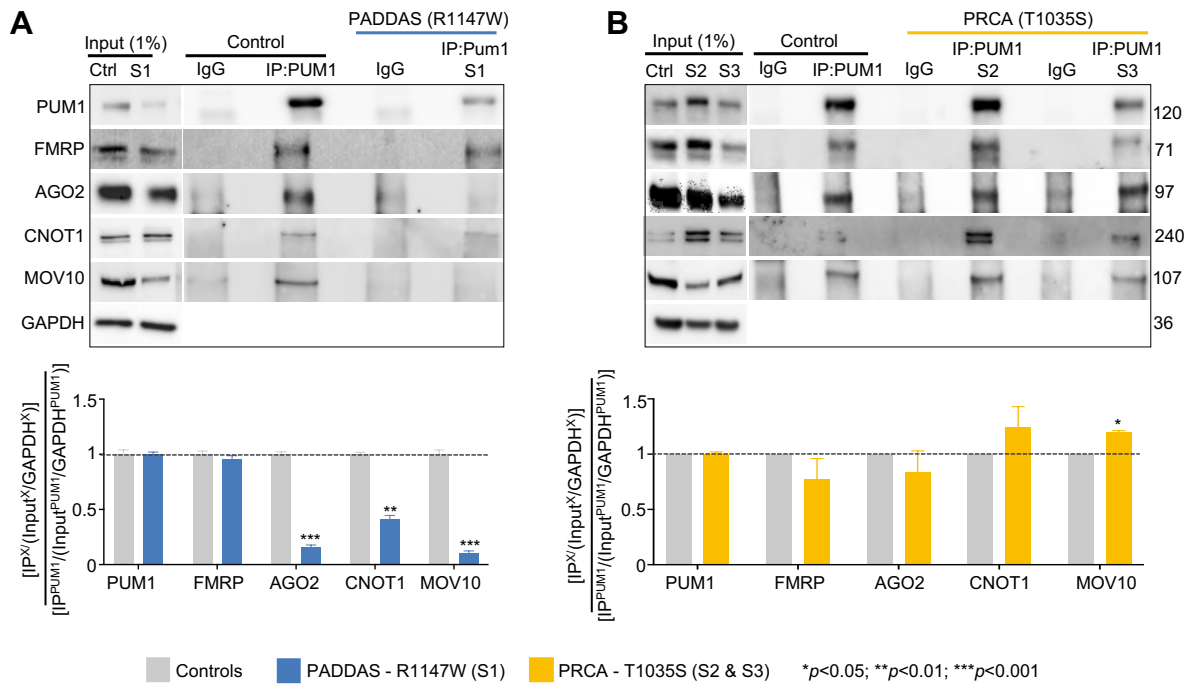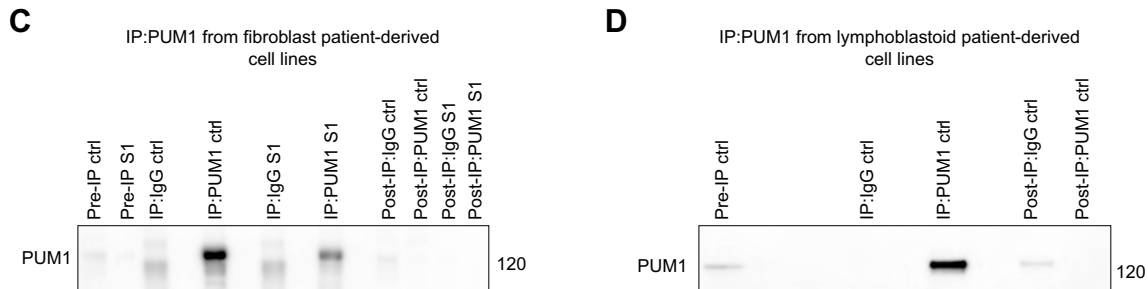

**Supplemental Figure 13. PUM1 validation experiments in patient-derived cells.** (A) IP against PUM1 from PADDAS (R1147W; Subject 1 or S1) patient-derived fibroblasts confirms the interactions between PUM1 (used here as a positive control), and PUM2, FMRP, AGO2, CNOT1, and MOV10. *Bottom panel*: protein quantification shows loss of interaction between PUM1-R1147W and AGO2, CNOT1 and MOV10 compared to three age- and sex- matched control fibroblasts. Input (1%) was used as a loading control and IP against IgG was used as a negative control. (B) IP against PUM1 from two PRCA (T1035S) patient-derived lymphoblastoid cell lines (S2 and S3) confirm the interaction between PUM1 (used here as positive control), and PUM2, FMRP, AGO2, CNOT1, and MOV10. *Bottom panel*: protein quantification shows a slight decrease in interactions with FMRP and AGO2, and a slight increase with CNOT1 and MOV10, compared to age- and sex- matched lymphoblastoid controls. Input (1%) was used as a loading control and IP against IgG was used as a negative control. In A and B, the amount of protein pulled down compared to IP-PUM1 was quantified as follows:  $\frac{[IP^X/(Input^X/GAPDH^X)]}{[IP^{PUM1}/(Input^{PUM1}/GAPDH^{PUM1})]}$ , where X is the protein of interest. All the IPs were repeated at least three times. Data represent mean  $\pm$  SEM. P values were calculated by two-tailed Student's t test. \* $p < 0.05$ , \*\* $p < 0.01$ , \*\*\* $p < 0.001$ . (C-D) Pre-IP, IP, and post-IP against PUM1 and IgG from (C) PADDAS fibroblasts and (D) PRCA lymphoblastoid cells. In both cell lines we were able to pull down 100% of PUM1. Pre-IP represents 1% from the initial protein lysate as a loading control, while 10% of the protein lysate was loaded as post-IP. Molecular weights provided at right in kilodaltons (kDa).

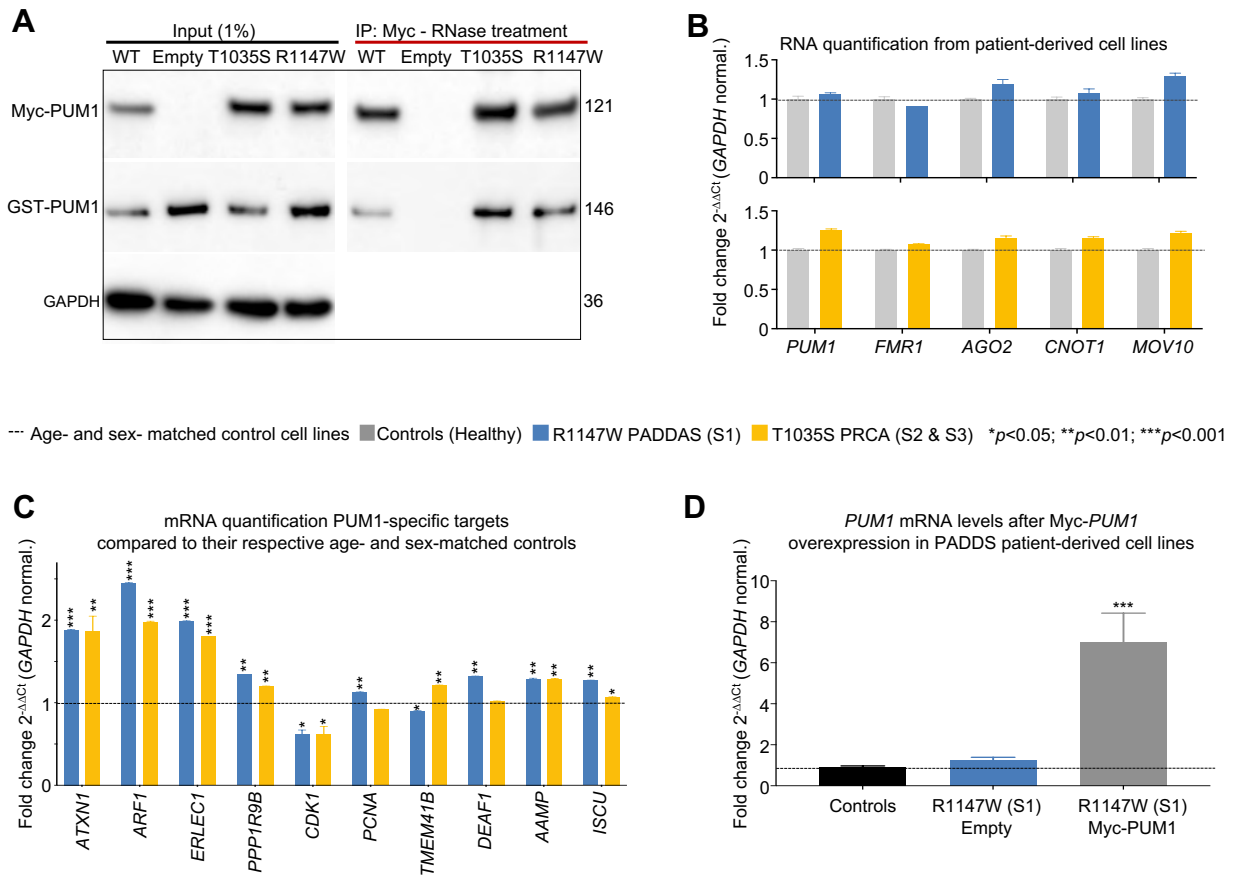

**Supplemental Figure 14. PUM1 dimerization with RNase treatment, quantification of PUM1**

**interactor mRNA and PUM1-specific targets in patient-derived cell lines. (A)** Representative western blots of IP with RNase treatment against Myc-PUM1-WT, Myc-PUM1-T1035S (PRCA), and Myc-PUM1-R1147W (PADDAS) followed by immunoblotting to test binding between PUM1 proteins without the RNA. The numbers on the right are the respective molecular weights expressed in kilodaltons (kDa). **(B)** mRNA quantification for all of the immunoblotted proteins in Figure 6E in PADDAS and PRCA patient-derived cell lines compared to their respective age-, sex-, and cell-type-matched controls. **(C)** qPCR analysis of validated PUM1-specific targets from PADDAS patient-derived fibroblasts (blue bars) compared to three age- and sex-matched fibroblast control cell lines, and PRCA patient-derived lymphoblastoid cell lines (orange bars) compared to three age- and sex-matched lymphoblastoid control cell lines. Only genes expressed in both fibroblasts and lymphoblasts are represented here, for a total of 10 genes. **(D)** mRNA quantification of PUM1 from PADDAS patient-derived fibroblasts transfected with empty and Myc-PUM1-WT vectors, compared to three age- and sex-matched fibroblast control cell lines. For **B**, **C**, and **D** all data were normalized to *GAPDH* mRNA levels and experiments performed at least three times. Data represent mean  $\pm$  SEM. P values were calculated by two-tailed Student's t test. \**p* < 0.05, \*\**p* < 0.01, \*\*\**p* < 0.001.

## **Supplemental Methods**

### **HEK293T cell culture and maintenance**

Human embryonic kidney immortalized 293T (HEK293T) cells were grown in DMEM (GenDepot, #CM002-320) supplemented with 10% of heat-inactivated fetal bovine serum (FBS [GenDepot, #F0901-050) and 1% penicillin/streptomycin (GenDepot, #CA005-010). All cells were incubated at 37 °C in a humidified chamber supplemented with 5% CO<sub>2</sub>. HEK293T cells were later processed according to the needs of specific experiments (described below).

### **Patient-derived cell lines**

Primary fibroblasts from the *PUMI* PADDAS patient and the age- and sex-matched controls were generated as previously described (1). Briefly, cells were isolated from skin biopsies taken from the patient or age-matched controls using standard methodology (Barch and Association of Cytogenetic Technology, 1991) and placed in a transport medium (Ham's F10, Thermo Scientific, #11550043). The skin specimen was later removed from the transport medium using a sterile technique (in a Class II biohazard cabinet) and transferred to a sterile Petri dish where it was cut into small pieces (< 0.5 mm) using sterile scalpel blades. These pieces were transferred to the lower surface of a 25 cm<sup>2</sup> culture flask (6-8 pieces per flask) which had been pre-moistened with 1-2 mL of AmnioMAX Complete Medium (Thermo Scientific, #11269016) supplemented with 1% penicillin/streptomycin (GenDepot, #CA005-010). Cell cultures were maintained at 37 °C in a humidified incubator supplemented with 5% CO<sub>2</sub>. When cell growth was observed around the edges of the tissue, usually 3 to 5 days later, 2 to 3 mL of AmnioMAX Complete Medium were added. Once growth was established and the tissue was anchored to the flask, another 8 mL of AmnioMAX Complete Medium was added. Thereafter, the medium was renewed every 3 to 4 days until ready for sub-culturing.

Lymphoblastoid cells from *PUMI* PRCA patients and the age- and sex-matched controls were generated as previously described (1). Briefly, lymphoblastoid suspension cell cultures were grown in RPMI 1640 medium (Invitrogen, #11875093) supplemented with 10% heat-inactivated fetal bovine serum (Atlanta Biological, Flowery Branch, #S11195H) and 1% penicillin/streptomycin (GenDepot, #CA005-010). Cell cultures were maintained at 37°C in a humidified incubator supplemented with 5% CO<sub>2</sub>. Medium was renewed every 2 to 3 days.

### **Immunoprecipitation (IP) experiments using mouse brain tissue**

Mouse brain tissues were gathered from an equal number of 10-week-old male and female mice. For whole-brain experiments, we combined and homogenized two 10-week-old wild-type mouse brains per

sample (1 female and 1 male), aliquoting half of each sample for IP against either Pum1 or IgG, then performed six biological replicates (12 mice total) for each mass spec experiment against IP-Pum1 and IP-IgG. For experiments on the hippocampus, cerebellum, and cortex, we needed much larger numbers of mice: we combined cerebellar and cortical tissues from eight wild-type mice (4 male and 4 female) and performed the experiment in triplicate (total of 24 mice), while for hippocampus we combined tissues from ten wild-type mice (5 female and 5 male) for three experiments (a total of 30 mice).

Samples were processed with a dounce homogenizer using a lysis buffer consisting of 200mM NaCl<sub>2</sub>, 100mM NaPO<sub>4</sub>, 20mM Hepes pH 7.4, 1% Triton X (which should disrupt all but the strongest protein-protein interactions) and complemented by 1X of Xpert Protease and 1X of Phosphatase Inhibitor Cocktail Solutions (GenDepot, #P3100-100, #P3200-020). Following homogenization, the samples were placed on ice for 15 minutes then centrifuged at 14,800 rpm at 4°C for 25 minutes to remove the debris from the supernatant. The supernatant was then moved to 1.5 ml tubes (Beckman microfuge tube #357448) and spun down in a Beckman ultra-centrifuge (Optima Max XP) at 4°C for 25 minutes at 44,000 rpm. 10% of the protein lysate was stored as input and only 1% was loaded for western blot. The protein extract was later divided into two aliquots, one for IP against the protein of interest (antibodies listed below) and the other for IP against IgG, and was then incubated with 30 µL of Dynabeads™ Protein G (Invitrogen, #10004D) and 5 µg of antibody overnight at 4°C on a rotisserie tube rotator. The next day, the beads were washed four times with the same lysis buffer used for IP and resuspended in 40µL of elution buffer (consisting of lysis buffer, NuPAGE 10X Reducing Agent [Invitrogen, #NP0009], NuPAGE LDS sample buffer at 1X final concentration [Invitrogen, #NP0007]) and boiled at 95°C for 10 minutes before the samples were loaded in the NuPAGE 4%–12% Bis-Tris Gels (Invitrogen, #NP0335BOX & #NP0336BOX) for further resolution and western blot analysis.

For the IP with RNase treatment, the beads were resuspended in 400 µL of lysis buffer after the three final washes and divided into two separate 1.5 ml tubes of 200 µL each. To establish the dose required to remove all RNA, we tested different amounts of RNase I (Invitrogen, #EN0602) and found that 4 µL was enough to render RNA undetectable both by denaturing gel and cDNA amplification. This sample and the negative control (i.e., one without RNase treatment) were incubated at 37°C for 15 min on a rotisserie tube rotator. After incubation, all the samples were washed one last time with 500 µL of lysis buffer and then eluted in 20 µL of elution buffer. We used the same protocol for all the IP processed by mass spectrometry.

The antibodies used for IP were: goat α-PUM1 (Bethyl Laboratories, #A300-201A), rabbit α-PUM2 (Bethyl Laboratories, #A300-202A), rabbit α-FMRP (Abcam Cambridge, #ab17722), rabbit α-AGO2 (Abcam Cambridge, #ab32381), rabbit α-NeuN (Thermo Fisher Scientific, #PA5-37407), rabbit α-CNOT1 (Cell Signaling Technology, #44613), rabbit α-MOV10 (Bethyl Laboratories, #A301-571A), and

rabbit  $\alpha$ -ANAPC1 (Bethyl Laboratories, #A301-653A).

Please note that *in vivo* IPs from brain lysates present certain challenges that are not encountered *in vitro*. Whereas the total lysate from cells is usually 200 $\mu$ l-300 $\mu$ l, the brain lysate is made in a large volume, usually 1.5 to 2.4 ml, depending on the size of the brain or brain region. This means that in a normal western blot that accommodates 30-40 $\mu$ l total volume, including reducing buffer and loading blue, we cannot load more than 1%-3% from the total brain lysate as input. Therefore, when we pull down a protein of interest (Pum1) and immunoblot for the same protein compared to a standard input (loading the entire IP in one gel), the resulting IP band will be much darker than the input. We then need to expose the Input from the same membrane much longer to visualize it—this is common practice when working with *in vivo* tissues (2-7).

### **Immunoprecipitation experiments from HEK293T and patient-derived cell lines**

HEK293T cells and patient-derived fibroblasts or lymphoblastoid cells were lysed by pipetting up and down with a 1000 $\mu$ l tip in a lysis buffer consisting of 200mM NaCl<sub>2</sub>, 100mM NaPO<sub>4</sub>, 20mM Hepes pH 7.4, 1% Triton X and complemented by 1X of Xpert Protease and 1X of Phosphatase Inhibitor Cocktail (GenDepot, #P3100-100, #P3200-020). The rest of the protocol is the same as described above for mouse brain tissue, except that we used 2.5  $\mu$ g of primary antibody for IP.

### **Co-Immunoprecipitation in-gel digestion for mass spectrometry**

Immunoprecipitated samples were separated on NuPAGE 4-12% gradient SDS-PAGE (Invitrogen, #NP0335BOX & #NP0336BOX) and stained with SimplyBlue (Invitrogen, #LC6060). Protein gel slices were excised and *in-gel* digestion performed as previously described (8), with minor modifications. Gel slices were washed with 1:1 Acetonitrile and 100mM ammonium bicarbonate for 30 min then dehydrated with 100% acetonitrile for 10 min until shrunk. The excess acetonitrile was then removed and the slices dried in a speed-vacuum at room temperature for 10 minutes. Gel slices were reduced with 5 mM DTT for 30 min at 56°C in an air thermostat, cooled down to room temperature, and alkylated with 11 mM IAA for 30 min with no light. Gel slices were then washed with 100 mM of ammonium bicarbonate and 100% acetonitrile for 10 min each. Excess acetonitrile was removed and dried in a speed-vacuum for 10 min at room temperature and the gel slices were re-hydrated in a solution of 25 ng/ $\mu$ l trypsin in 50 mM ammonium bicarbonate for 30 min on ice and digested overnight at 37 °C in an air thermostat. Digested peptides were collected and further extracted from gel slices in extraction buffer (1:2 ratio by volume of 5% formic acid: acetonitrile) at high speed, shaking in an air thermostat. The supernatants from both extractions were combined and dried in a speed-vacuum. Peptides were dissolved in 3% acetonitrile/0.1% formic acid.

## Liquid chromatography with tandem mass spectrometry (LC-MS/MS)

The Thermo Scientific Orbitrap Fusion Tribrid mass spectrometer was used for peptide tandem mass spectrometry (MS/MS). Desalted peptides were injected in an EASY-Spray™ PepMap™ RSLC C18 50cm X 75cm ID column (Thermo Scientific) connected to the Orbitrap Fusion™ Tribrid™. Peptide elution and separation were achieved at a non-linear flow rate of 250 nl/min using a gradient of 5%-30% of buffer B (0.1% (v/v) formic acid, 100% acetonitrile) for 110 minutes, maintaining the temperature of the column at 50 °C during the entire experiment. Survey scans of peptide precursors are performed from 400 to 1500 *m/z* at 120K full width at half maximum (FWHM) resolution (at 200 *m/z*) with a  $2 \times 10^5$  ion count target and a maximum injection time of 50 ms. The instrument was set to run in top speed mode with 3-second cycles for the survey and the MS/MS scans. After a survey scan, MS/MS was performed on the most abundant precursors, i.e., those ions that had a charge state between 2 and 6, and an intensity of at least 5000, by isolating them in the quadrupole at 1.6 Th. We used collision-induced dissociation (CID) with 35% collision energy and detected the resulting fragments with the rapid scan rate in the ion trap. The automatic gain control (AGC) target for MS/MS was set to  $1 \times 10^4$  and the maximum injection time was limited to 35ms. The dynamic exclusion was set to 45s with a 10ppm mass tolerance around the precursor and its isotopes. Monoisotopic precursor selection was enabled.

## LC-MS/MS data analysis

Raw mass spectrometric data were analyzed using the MaxQuant environment v.1.6.1.0 (9) and Andromeda for database searches (10) at default settings with a few modifications. The default was used for first search tolerance and main search tolerance (20 ppm and 6 ppm, respectively). MaxQuant was set up to search with the reference mouse proteome database downloaded from Uniprot (<https://www.uniprot.org/proteomes/UP000000589>). MaxQuant searched for trypsin digestion with up to 2 missed cleavages. Peptide, site and protein false discovery rates (FDR) were all set to 1% with a minimum of 1 peptide needed for identification; label-free quantitation (LFQ) was performed with a minimum ratio count of 1. The following modifications were used for protein quantification: oxidation of methionine (M), acetylation of the protein N-terminus, and deamination for asparagine or glutamine (NQ). Results obtained from MaxQuant were further analyzed using the Perseus statistical package (11) that is part of the MaxQuant distribution. Protein identifications were filtered for common contaminants. Proteins were considered for quantification only if they were found in at least two replicate groups. Significant alterations in protein abundance were determined by ANOVA with a threshold for significance of  $P < 0.05$  (permutation-based FDR correction). Pum1 protein interactors were later considered if they were found in at least five out of six mass spec experiments for whole brain and in at

least two out of three experiments for each respective brain region with a fold-change of >1.5 between LFQ-PUM1-WT and LFQ-IgG-WT (see Supplemental Table 1).

### **Protein-protein interaction map**

The protein-protein interaction map for the whole brain (Supplemental Figure 2A) was generated by Cytoscape (<https://cytoscape.org/>) (12) and interactions were inferred from Corum (13) and the Human Protein Atlas (14) by g:GOST, which is a package of g:Profiler (<https://biit.cs.ut.ee/gprofiler/gost>) (15). The brain region-specific map (Figure 1A) was generated by Cytoscape.

### **Protein quantification and western blot analysis**

Patient-derived lymphoblastoid, fibroblast cell lines, and control cell lines were collected at  $6 \times 10^6$  cell confluence and processed for protein extraction. For mouse tissues, we processed either half of the whole brain (the other half was processed for RNA extraction, see below) or the entire hippocampus, cortex, or cerebellum for protein extraction. Mouse tissues or cell pellets were subsequently lysed with modified RIPA buffer consisting of 25 mM Tris-HCL, pH 7.6, 150 mM NaCl, 1.0% Tween 20, 1.0% sodium deoxycholate, 0.1% SDS, completed with 1X Xpert Protease and 1X Phosphatase Inhibitor Cocktail Solutions (GenDepot, #P3100-100 & #P3200-020). Cells were lysed by pipetting them up and down with a p1000 tip and then placed on ice for 20 min followed by centrifugation at 14,800 rpm at 4°C for 25 minutes. Mouse brain tissues were pipetted up and down by syringe needles—starting from an 18G 1½” (Becton Dickson, #305196), moving to 21G 1½” (Becton Dickson, #305167) and finally to a 26G 1½” (Becton Dickson, #305111) needle—until the lysate passed through the needle smoothly. Proteins were quantified by Pierce BCA Protein Assay Kit (Thermo Scientific, # PI23225) and their absorbance measured by NanoDrop OneC (Thermo Scientific). Proteins were resolved by high resolution NuPAGE 4%–12% Bis-Tris Gel (Invitrogen, #NP0335BOX & #NP0336BOX) according to the manufacturer’s instructions. All the blots were acquired on the G:BOX Chemi XX9 machine (Syngene; Frederick, MD) using GeneSys software 1.6.5.0. Gel exposures were determined by the software.

Antibodies used for western blot experiments were: goat  $\alpha$ -PUM1 [1:2500, (Bethyl Laboratories, #A300-201A)], rabbit  $\alpha$ -PUM1 [1:2000, (Abcam Cambridge, #ab92545)], rabbit  $\alpha$ -PUM2 [1:2000, (Bethyl Laboratories, # A300-202A)], rabbit  $\alpha$ -FMRP [1:1000, (Abcam Cambridge, #ab17722)], rabbit  $\alpha$ -AGO2 [1:1000, (Abcam Cambridge, #ab32381)], rabbit  $\alpha$ -NeuN (Rbfox3) [1:1000, (Thermo Scientific, #PA5-37407)], rabbit  $\alpha$ -CNOT1 [1:1000, (Cell Signaling Technology, #44613)], rabbit  $\alpha$ -MOV10 [1:2000, (Bethyl Laboratories, #A301-571A)], and mouse  $\alpha$ -GAPDH [1:10000, (Millipore, #CB1001)].



### **RNA extraction and quantitative real-time PCR (qPCR)**

Human fibroblast, lymphoblastoid, and respective control cell lines were harvested at 6 X 10<sup>6</sup> confluence prior to RNA extraction. For mouse tissues, half of the whole brain (the other half was processed for protein extraction, see above) or the entire hippocampus, cortex, or cerebellum were processed for RNA extraction. The RNA was collected for both human cells, mouse brain and brain region tissues using the miRNeasy kit (QIAGEN, # 217004) according to the manufacturer's instructions. RNA was quantified using NanoDrop OneC (Thermo Fisher Scientific). cDNA was synthesized using Quantitect Reverse Transcription kit (QIAGEN, # 205313) starting from 1 µg of RNA. Quantitative RT-polymerase chain reaction (qRT-PCR) experiments were performed using the CFX96 Touch Real-Time PCR Detection System (Bio-Rad Laboratories, Hercules) with PowerUP SYBR Green Master Mix (Applied Biosystems, #A25743). Real-time PCR runs were analyzed using the comparative C<sub>T</sub> method normalized against the housekeeping human gene *GAPDH* or mouse *Gapdh*, depending on the experiment (16).

### **Fibroblast patient-derived cell lines transfection**

Fibroblasts from age- and sex-matched healthy controls and from a female PADDAS patient were seeded at 80% of confluency in 6-well plates (~150.000 cells/well). The day after, 500ng of pRK5-CMV-Myc-Pum1 or pRK5-CMV-Myc-Empty plasmids were transfected in antibiotic-free DMEM (GenDepot, #CM002-320) using Lipofectamine LTX with Plus Reagent (Thermo Fisher, #15338030) according to the manufacturer's protocol. After 5 hours we replaced the media with new complete DMEM supplemented with 10% of heat-inactivated fetal bovine serum (FBS [GenDepot, #F0901-050]) and 1% penicillin/streptomycin (GenDepot, #CA005-010). Cells were incubated at 37 °C in a humidified chamber supplemented with 5% CO<sub>2</sub> and collected after 72 hours for RNA and protein extraction.

### **MicroRNA library construction and sequencing**

Library preparation and microRNA sequencing was performed by LC Sciences according to the following criteria. Total RNA was extracted from cerebellum of WT and *Pum1*<sup>-/-</sup> male and female at 10 weeks of age in triplicate, for a total of 12 samples using the miRNeasy kit (QIAGEN, # 217004) according to the manufacturer's instructions. The total RNA quality and quantity were assessed with Bioanalyzer 2100 (Agilent Technologies, Santa Clara) with RIN number > 7.0. Approximately 1 µg of total RNA were used to prepare the small RNA library according to the protocol of TruSeq Small RNA Sample Prep Kits (Illumina, San Diego). Then the single-end sequencing 50bp was performed on an Illumina HiSeq 2500 at LC Sciences (Hangzhou, China) following the vendor's recommended protocol.

### **MicroRNA sequencing bioinformatic analysis**

Raw reads were subjected to an in-house program, ACGT101-miR (LC Sciences, Houston), to remove adapter dimers, junk, common RNA families (rRNA, tRNA, snRNA, snoRNA), and repeats. Subsequently, unique sequences of 18–26 nucleotides in length were mapped to specific species precursors in miRBase 22.0 (<http://www.mirbase.org/>) by BLAST search to identify known miRNAs and novel 3p- and 5p-derived miRNAs. Length variation at both 3' and 5' ends and one mismatch inside of the sequence were allowed in the alignment. The unique sequences mapping to specific species of mature miRNAs in hairpin arms were identified as known miRNAs. The unique sequences mapping to the other arm of known specific species precursor hairpins opposite the annotated mature miRNA-containing arm were considered to be novel 5p- or 3p-derived miRNA candidates. The remaining sequences were mapped to other selected species precursors (with the exclusion of specific species) in miRBase 22.0 by BLAST search, and the mapped pre-miRNAs were further BLASTed against the specific species genomes to determine their genomic locations. The last two were also defined as known miRNAs. The unmapped sequences were BLASTed against the specific genomes, and the hairpin RNA structures containing sequences were predicted from the flank 80 nt sequences using RNAfold software (<http://rna.tbi.univie.ac.at/cgi-bin/RNAWebSuite/RNAfold.cgi>). The criteria for secondary structure prediction were: (1) number of nucleotides in one bulge in stem ( $\leq 12$ ), (2) number of base pairs in the stem region of the predicted hairpin ( $\geq 16$ ), (3) cutoff of free energy (kCal/mol  $\leq -15$ ), (4) length of hairpin (up and down stems + terminal loop  $\geq 50$ ), (5) length of hairpin loop ( $\leq 20$ ), (6) number of nucleotides in one bulge in mature region ( $\leq 8$ ), (7) number of biased errors in one bulge in mature region ( $\leq 4$ ), (8) number of biased bulges in mature region ( $\leq 2$ ), (9) number of errors in mature region ( $\leq 7$ ), (10) number of base pairs in the mature region of the predicted hairpin ( $\geq 12$ ), (11) percent of mature region in stem ( $\geq 80$ ).

### **Gene Set Enrichment Analysis (GSEA)**

GSEA was performed as previously described (17). The cumulative distribution function was conducted by performing 1000 random gene-set membership assignments. A nominal p-value  $< 0.01$  and an FDR  $< 0.25$  were used to assess the significance of the enrichment score (ES). HITS-CLIP data, and the respective rank, were obtained from the literature and were initially acquired as follows: Pum1 and Pum2 from neonatal murine brains (18), Fmrp from cerebellum, cortex, and hippocampus together (19), Ago2 from neocortex at embryonic day 13 (20), Rbfox3 from mouse brain (age not specified) (21), Nova from mouse brain (age not specified) (22), Ptpb2 from neocortex at embryonic day 18.5 (23), Mbnl2 from hippocampus at 8-12 weeks of age (24), and Apc from mouse brain at embryonic day 14 (25).

## Gene ontology analyses

Gene ontology analyses were performed with David Gene Ontology (GO). For Figure 1B, Supplemental Figure 12B and C only categories with FDR<0.05 were considered; while for Supplemental Figure 11D only categories with FDR<0.01 were considered. David GO for the Pum1 interactome in Figure 1B considered the entire interactome as background. For the GO regarding the HITS-CLIP targets shared among Pum1, Pum2, Fmrp, Ago2, and Rbfox3 (Supplemental Figure 12B and C), we considered the entire set of all targetomes together as background. Regarding the Synaptic (Syn) GO analysis, brain-expressed genes were used as background (26).

## Myc and GST cloning procedure with in vitro immunoprecipitation (IP) assays

Human *PUM1* full-length cDNA was amplified by PCR and subcloned in a pRK5 plasmid containing the Myc tag sequence (Addgene, pRK5-Myc-Parkin #17612) at the N-terminal by using Sall (New England Biolabs, # R3138S) and NotI (New England Biolabs, #R0189S) restriction enzymes to replace *Parkin* with *PUM1*. For GST, the human full-length *PUM1* cDNA was, again, subcloned first in the pRK5 plasmid containing the GST tag sequence (Addgene, pRK5-HA GST RagC wt, #19304) at the N-terminal by using Sall and NotI restriction enzymes to replace *RagC* with *PUM1*. Human *FMRP*, *AGO2* and *CNOT1*, full-length cDNA were cloned and contain the GST tag sequence at the N-terminal, as described for GST-*PUM1*.

To introduce the T1035S or R1147W mutations we used the QuikChange II XL Multi Site-Directed Mutagenesis kit (Agilent Technologies, #200521). The primers for the single mutagenesis experiments were designed by QuikChange software (Stratagene, San Diego, <https://www.genomics.agilent.com/primerDesignProgram.jsp>).

For IP, HEK293T cells were seeded in 6-well plates for 24 h and then transfected with 250 ng of either WT or mutant PUM1 plasmid with one of the interactors using the jetPRIME Transfection Reagent (Polyplus transfection, #55-132) as per the manufacturer's protocol. pRK5-Myc empty plasmid (no cDNA) was used as a negative control. After 48 h, the cells were collected and processed for immunoprecipitation. Protein lysates were incubated overnight at 4°C with mouse  $\alpha$ -Myc antibody (1:400, [Cell Signaling Technologies, #2276]) on a rotisserie tube rotator. The next day, the beads were washed four times with an IP lysis buffer and resuspended in 40  $\mu$ L elution buffer (lysis buffer, NuPAGE 10X Reducing Agent [Invitrogen, #NP0009], NuPAGE LDS sample buffer 4X [Invitrogen, #NP0007]) and boiled at 95°C for 10 minutes before loading the samples in NuPAGE 4%–12% Bis-Tris Gels (Invitrogen, #NP0335BOX & #NP0336BOX) for further resolution and western blot analysis. Antibodies: mouse  $\alpha$ -Myc antibody [1:2000, (Cell Signaling Technologies, #2276)], rabbit  $\alpha$ -GST antibody [1:1000, (Cell Signaling Technologies, #2625)], mouse  $\alpha$ -GAPDH [1:10000, (Millipore, #CB1001)].

## Primers

For the qPCR analysis to unambiguously distinguish spliced cDNA from genomic DNA contamination, specific exon primers were designed to amplify across introns of the gene tested. The primers for all genes tested were designed with Primer3 (27, 28). Cloning primers were manually designed to amplify the longest spliced gene isoform tested; if there was more than one isoform according to the UCSC Genome Browser (<https://genome.ucsc.edu/>), we chose the longest. See Supplemental Table 7 for primer sequences.

## References

1. Gennarino VA, Palmer EE, McDonnell LM, Wang L, Adamski CJ, Koire A, et al. A mild PUM1 mutation is associated with adult-onset ataxia, whereas haploinsufficiency causes developmental delay and seizures. *Cell*. 2018;172(5):924-36 e11.
2. De Maio A, Yalamanchili HK, Adamski CJ, Gennarino VA, Liu Z, Qin J, et al. RBM17 Interacts with U2SURP and CHERP to Regulate Expression and Splicing of RNA-Processing Proteins. *Cell Rep*. 2018;25(3):726-36 e7.
3. Lee Y, Samaco RC, Gatchel JR, Thaller C, Orr HT, and Zoghbi HY. miR-19, miR-101 and miR-130 co-regulate ATXN1 levels to potentially modulate SCA1 pathogenesis. *Nat Neurosci*. 2008;11(10):1137-9.
4. Rousseaux MWC, Tschumperlin T, Lu HC, Lackey EP, Bondar VV, Wan YW, et al. ATXN1-CIC Complex Is the Primary Driver of Cerebellar Pathology in Spinocerebellar Ataxia Type 1 through a Gain-of-Function Mechanism. *Neuron*. 2018;97(6):1235-43 e5.
5. Di Grazia A, Marafini I, Pedini G, Di Fusco D, Laudisi F, Dinallo V, et al. The Fragile X Mental Retardation Protein Regulates RIPK1 and Colorectal Cancer Resistance to Necroptosis. *Cell Mol Gastroenterol Hepatol*. 2021;11(2):639-58.
6. Jin Z, Feng H, Liang J, Jing X, Zhao Q, Zhan L, et al. FGFR3 big up tri, open7-9 promotes tumor progression via the phosphorylation and destabilization of ten-eleven translocation-2 in human hepatocellular carcinoma. *Cell Death Dis*. 2020;11(10):903.
7. Lee EJ, Seo E, Kim JW, Nam SA, Lee JY, Jun J, et al. TAZ/Wnt-beta-catenin/c-MYC axis regulates cystogenesis in polycystic kidney disease. *Proc Natl Acad Sci U S A*. 2020;117(46):29001-12.
8. Shevchenko A, Tomas H, Havlis J, Olsen JV, and Mann M. In-gel digestion for mass spectrometric characterization of proteins and proteomes. *Nat Protoc*. 2006;1(6):2856-60.
9. Cox J, and Mann M. MaxQuant enables high peptide identification rates, individualized p.p.b.-range mass accuracies and proteome-wide protein quantification. *Nat Biotechnol*. 2008;26(12):1367-72.
10. Cox J, Neuhauser N, Michalski A, Scheltema RA, Olsen JV, and Mann M. Andromeda: a peptide search engine integrated into the MaxQuant environment. *J Proteome Res*. 2011;10(4):1794-805.
11. Tyanova S, Temu T, Sinitcyn P, Carlson A, Hein MY, Geiger T, et al. The Perseus computational platform for comprehensive analysis of (prote)omics data. *Nat Methods*. 2016;13(9):731-40.
12. Otasek D, Morris JH, Boucas J, Pico AR, and Demchak B. Cytoscape Automation: empowering workflow-based network analysis. *Genome Biol*. 2019;20(1):185.
13. Giurgiu M, Reinhard J, Brauner B, Dunger-Kaltenbach I, Fobo G, Frishman G, et al. CORUM: the comprehensive resource of mammalian protein complexes-2019. *Nucleic Acids Res*. 2019;47(D1):D559-D63.

14. Thul PJ, Akesson L, Wiking M, Mahdessian D, Geladaki A, Ait Blal H, et al. A subcellular map of the human proteome. *Science*. 2017;356(6340).
15. Raudvere U, Kolberg L, Kuzmin I, Arak T, Adler P, Peterson H, et al. g:Profiler: a web server for functional enrichment analysis and conversions of gene lists (2019 update). *Nucleic Acids Res*. 2019;47(W1):W191-W8.
16. Vandesompele J, De Preter K, Pattyn F, Poppe B, Van Roy N, De Paepe A, et al. Accurate normalization of real-time quantitative RT-PCR data by geometric averaging of multiple internal control genes. *Genome Biol*. 2002;3(7).
17. Subramanian A, Tamayo P, Mootha VK, Mukherjee S, Ebert BL, Gillette MA, et al. Gene set enrichment analysis: a knowledge-based approach for interpreting genome-wide expression profiles. *Proc Natl Acad Sci U S A*. 2005;102(43):15545-50.
18. Zhang M, Chen D, Xia J, Han W, Cui X, Neuenkirchen N, et al. Post-transcriptional regulation of mouse neurogenesis by Pumilio proteins. *Genes Dev*. 2017;31(13):1354-69.
19. Maurin T, Lebrigand K, Castagnola S, Paquet A, Jarjat M, Popa A, et al. HITS-CLIP in various brain areas reveals new targets and new modalities of RNA binding by fragile X mental retardation protein. *Nucleic Acids Res*. 2018;46(12):6344-55.
20. Chi SW, Zang JB, Mele A, and Darnell RB. Argonaute HITS-CLIP decodes microRNA-mRNA interaction maps. *Nature*. 2009;460(7254):479-86.
21. Weyn-Vanhenhenryck SM, Mele A, Yan Q, Sun S, Farny N, Zhang Z, et al. HITS-CLIP and integrative modeling define the Rbfox splicing-regulatory network linked to brain development and autism. *Cell Rep*. 2014;6(6):1139-52.
22. Zhang C, Frias MA, Mele A, Ruggiu M, Eom T, Marney CB, et al. Integrative modeling defines the Nova splicing-regulatory network and its combinatorial controls. *Science*. 2010;329(5990):439-43.
23. Licatalosi DD, Yano M, Fak JJ, Mele A, Grabinski SE, Zhang C, et al. Ptpb2 represses adult-specific splicing to regulate the generation of neuronal precursors in the embryonic brain. *Genes Dev*. 2012;26(14):1626-42.
24. Charizanis K, Lee KY, Batra R, Goodwin M, Zhang C, Yuan Y, et al. Muscleblind-like 2-mediated alternative splicing in the developing brain and dysregulation in myotonic dystrophy. *Neuron*. 2012;75(3):437-50.
25. Preitner N, Quan J, Nowakowski DW, Hancock ML, Shi J, Tcherkezian J, et al. APC is an RNA-binding protein, and its interactome provides a link to neural development and microtubule assembly. *Cell*. 2014;158(2):368-82.
26. Koopmans F, van Nierop P, Andres-Alonso M, Byrnes A, Cijssouw T, Coba MP, et al. SynGO: An Evidence-Based, Expert-Curated Knowledge Base for the Synapse. *Neuron*. 2019;103(2):217-34 e4.
27. Koressaar T, and Remm M. Enhancements and modifications of primer design program Primer3. *Bioinformatics*. 2007;23(10):1289-91.
28. Untergasser A, Cutcutache I, Koressaar T, Ye J, Faircloth BC, Remm M, et al. Primer3--new capabilities and interfaces. *Nucleic Acids Res*. 2012;40(15):e115.
